# Supplementary material for: Monitoring of Serial Presurgical and Postsurgical Changes in the Serum Proteome in a Series of Patients with Calcific Aortic Stenosis
Source: Dis Markers. 2015 May 20;2015:694120. doi: 10.1155/2015/694120 (PMC4452854; doi:10.1155/2015/694120)
Supplement: Supplementary file 1 — We showed raw proteomic data of postsurgical versus presurgical sera in 5 CAS patients (P1-P5) in Supplementary Table 1 and those of two time points (T2 versus T1) with a 14-day interval in 4 healthy volunteers (N1-N4) after FDR analyses in Supplementary Table 2. [file 694120.f1.xlsx]

## Sheet: P1
Supplementary Table 1. Raw proteomic data of postsurgical vs. presurgical sera in 5 CAS patients (P1-P5) after FDR analyses.
								114 label: presurgical serum
								116 label: postsugical serum
CAS patient P1
N	Unused	Total	% Cov	Peptides(95%)	Accession #	Name	Species	116:114
1	235.7	235.7	74.5	161	sp|P01024|CO3_HUMAN	Complement C3 OS=Homo sapiens GN=C3 PE=1 SV=2	HUMAN	1.477
2	179.45	179.45	66.6	154	sp|P01023|A2MG_HUMAN	Alpha-2-macroglobulin OS=Homo sapiens GN=A2M PE=1 SV=1	HUMAN	0.9534
3	140.75	140.75	55.8	81	sp|P0C0L5|CO4B_HUMAN	Complement C4-B OS=Homo sapiens GN=C4B PE=1 SV=1	HUMAN	1.7095
4	137.4	137.4	73.2	124	sp|P02787|TRFE_HUMAN	Serotransferrin OS=Homo sapiens GN=TF PE=1 SV=2	HUMAN	0.9814
5	117.66	117.66	22.8	58	sp|P04114|APOB_HUMAN	Apolipoprotein B-100 OS=Homo sapiens GN=APOB PE=1 SV=1	HUMAN	1.341
6	92.07	92.07	50.6	58	sp|P00450|CERU_HUMAN	Ceruloplasmin OS=Homo sapiens GN=CP PE=1 SV=1	HUMAN	1.4817
7	87.85	87.85	52.4	57	sp|P08603|CFAH_HUMAN	Complement factor H OS=Homo sapiens GN=CFH PE=1 SV=4	HUMAN	1.3512
8	74.95	75.43	73.7	89	sp|P01009|A1AT_HUMAN	Alpha-1-antitrypsin OS=Homo sapiens GN=SERPINA1 PE=1 SV=3	HUMAN	1.515
9	74.3	74.42	81.5	106	sp|P00738|HPT_HUMAN	Haptoglobin OS=Homo sapiens GN=HP PE=1 SV=1	HUMAN	1.8978
10	71.25	71.25	94.8	67	sp|P02647|APOA1_HUMAN	Apolipoprotein A-I OS=Homo sapiens GN=APOA1 PE=1 SV=1	HUMAN	0.8527
11	68.59	68.59	66.8	39	sp|P02768|ALBU_HUMAN	Serum albumin OS=Homo sapiens GN=ALB PE=1 SV=2	HUMAN	0.5367
12	64.05	64.05	72.1	46	sp|P02790|HEMO_HUMAN	Hemopexin OS=Homo sapiens GN=HPX PE=1 SV=2	HUMAN	1.1055
13	61.92	62.02	26.1	33	sp|P02751|FINC_HUMAN	Fibronectin OS=Homo sapiens GN=FN1 PE=1 SV=3	HUMAN	1.0385
14	45.36	45.36	52.2	30	sp|P00751|CFAB_HUMAN	Complement factor B OS=Homo sapiens GN=CFB PE=1 SV=2	HUMAN	1.6336
15	43.03	43.03	57.5	42	sp|P01876|IGHA1_HUMAN	Ig alpha-1 chain C region OS=Homo sapiens GN=IGHA1 PE=1 SV=2	HUMAN	1.2438
16	42.89	43	55.1	23	sp|P02774|VTDB_HUMAN	Vitamin D-binding protein OS=Homo sapiens GN=GC PE=1 SV=1	HUMAN	1.3614
17	42.09	42.09	50.5	21	sp|P06727|APOA4_HUMAN	Apolipoprotein A-IV OS=Homo sapiens GN=APOA4 PE=1 SV=3	HUMAN	1.0604
18	39.26	39.26	42	18	sp|P00747|PLMN_HUMAN	Plasminogen OS=Homo sapiens GN=PLG PE=1 SV=2	HUMAN	1.3637
19	38.26	38.27	52.8	19	sp|P01008|ANT3_HUMAN	Antithrombin-III OS=Homo sapiens GN=SERPINC1 PE=1 SV=1	HUMAN	1.9466
20	37.62	37.62	44.2	29	sp|P01011|AACT_HUMAN	Alpha-1-antichymotrypsin OS=Homo sapiens GN=SERPINA3 PE=1 SV=2	HUMAN	2.3221
21	36.4	36.42	27.4	19	sp|P19823|ITIH2_HUMAN	Inter-alpha-trypsin inhibitor heavy chain H2 OS=Homo sapiens GN=ITIH2 PE=1 SV=1	HUMAN	0.8954
22	35.99	35.99	52.9	20	sp|P01871|IGHM_HUMAN	Ig mu chain C region OS=Homo sapiens GN=IGHM PE=1 SV=3	HUMAN	1.0932
23	34.78	34.84	33.9	24	sp|Q14624|ITIH4_HUMAN	Inter-alpha-trypsin inhibitor heavy chain H4 OS=Homo sapiens GN=ITIH4 PE=1 SV=3	HUMAN	1.4933
24	32.85	32.85	48.7	18	sp|P00734|THRB_HUMAN	Prothrombin OS=Homo sapiens GN=F2 PE=1 SV=2	HUMAN	0.9408
25	32.77	32.78	32.8	19	sp|P01042|KNG1_HUMAN	Kininogen-1 OS=Homo sapiens GN=KNG1 PE=1 SV=2	HUMAN	1.2168
26	32.37	32.37	57.3	21	sp|P25311|ZA2G_HUMAN	Zinc-alpha-2-glycoprotein OS=Homo sapiens GN=AZGP1 PE=1 SV=1	HUMAN	1.3792
27	32.2	32.2	58.7	19	sp|P02649|APOE_HUMAN	Apolipoprotein E OS=Homo sapiens GN=APOE PE=1 SV=1	HUMAN	1.2921
28	29.64	29.64	55.2	28	sp|P02763|A1AG1_HUMAN	Alpha-1-acid glycoprotein 1 OS=Homo sapiens GN=ORM1 PE=1 SV=1	HUMAN	2.3122
29	28.92	28.93	51	20	sp|P02749|APOH_HUMAN	Beta-2-glycoprotein 1 OS=Homo sapiens GN=APOH PE=1 SV=3	HUMAN	1.2213
30	27.63	27.63	40.4	13	sp|P04217|A1BG_HUMAN	Alpha-1B-glycoprotein OS=Homo sapiens GN=A1BG PE=1 SV=3	HUMAN	1.3994
31	27.09	27.1	38.8	17	sp|P10909|CLUS_HUMAN	Clusterin OS=Homo sapiens GN=CLU PE=1 SV=1	HUMAN	1.3337
32	25.9	25.9	28.8	13	sp|P04003|C4BPA_HUMAN	C4b-binding protein alpha chain OS=Homo sapiens GN=C4BPA PE=1 SV=2	HUMAN	1.2451
33	25.74	25.74	29.9	16	sp|P04004|VTNC_HUMAN	Vitronectin OS=Homo sapiens GN=VTN PE=1 SV=1	HUMAN	1.3029
34	25.19	25.19	25.6	14	sp|P19827|ITIH1_HUMAN	Inter-alpha-trypsin inhibitor heavy chain H1 OS=Homo sapiens GN=ITIH1 PE=1 SV=3	HUMAN	1.0285
35	24.04	24.04	30.5	12	sp|P04196|HRG_HUMAN	Histidine-rich glycoprotein OS=Homo sapiens GN=HRG PE=1 SV=1	HUMAN	0.9817
36	19.79	19.79	30	17	sp|P02765|FETUA_HUMAN	Alpha-2-HS-glycoprotein OS=Homo sapiens GN=AHSG PE=1 SV=1	HUMAN	0.952
37	19.74	19.83	14.1	9	sp|P01031|CO5_HUMAN	Complement C5 OS=Homo sapiens GN=C5 PE=1 SV=4	HUMAN	1.505
38	18.02	18.03	27.6	9	sp|P05155|IC1_HUMAN	Plasma protease C1 inhibitor OS=Homo sapiens GN=SERPING1 PE=1 SV=2	HUMAN	1.6992
39	18.01	18.2	14.1	9	sp|P02671|FIBA_HUMAN	Fibrinogen alpha chain OS=Homo sapiens GN=FGA PE=1 SV=2	HUMAN	1.1955
40	18	18	39.8	9	sp|P02750|A2GL_HUMAN	Leucine-rich alpha-2-glycoprotein OS=Homo sapiens GN=LRG1 PE=1 SV=2	HUMAN	1.8694
41	16.27	16.27	20.2	8	sp|P10643|CO7_HUMAN	Complement component C7 OS=Homo sapiens GN=C7 PE=1 SV=2	HUMAN	1.241
42	16.21	16.21	59.3	12	cont|000137	spt|P00760| Cationic trypsin precursor (EC 3.4.21.4) (Beta-trypsin) (Fragment) [Bos taurus (contaminant)]	Bos taurus (contaminant)	0.8006
43	16	16	41.8	10	sp|P02753|RET4_HUMAN	Retinol-binding protein 4 OS=Homo sapiens GN=RBP4 PE=1 SV=3	HUMAN	1.0378
44	15.65	15.65	97.2	18	sp|P01834|IGKC_HUMAN	Ig kappa chain C region OS=Homo sapiens GN=IGKC PE=1 SV=1	HUMAN	1.1796
45	15.29	15.29	21.8	8	sp|P05546|HEP2_HUMAN	Heparin cofactor 2 OS=Homo sapiens GN=SERPIND1 PE=1 SV=3	HUMAN	1.1625
46	15.08	15.19	59.2	7	sp|P35542|SAA4_HUMAN	Serum amyloid A-4 protein OS=Homo sapiens GN=SAA4 PE=1 SV=1	HUMAN	1.3972
47	14.57	14.57	34.4	7	sp|P02760|AMBP_HUMAN	Protein AMBP OS=Homo sapiens GN=AMBP PE=1 SV=1	HUMAN	1.2445
48	14.54	14.54	43.9	10	sp|P05090|APOD_HUMAN	Apolipoprotein D OS=Homo sapiens GN=APOD PE=1 SV=1	HUMAN	1.2116
49	14.21	14.21	22.1	7	sp|P06396|GELS_HUMAN	Gelsolin OS=Homo sapiens GN=GSN PE=1 SV=1	HUMAN	0.8615
50	14	14.88	76.2	10	sp|P02735|SAA_HUMAN	Serum amyloid A protein OS=Homo sapiens GN=SAA1 PE=1 SV=2	HUMAN	10.0778
51	13.4	13.4	35.4	10	sp|P02743|SAMP_HUMAN	Serum amyloid P-component OS=Homo sapiens GN=APCS PE=1 SV=2	HUMAN	2.1059
52	12.18	12.2	15.9	6	sp|P02748|CO9_HUMAN	Complement component C9 OS=Homo sapiens GN=C9 PE=1 SV=2	HUMAN	1.8498
53	11.43	11.46	62.6	6	sp|P02766|TTHY_HUMAN	Transthyretin OS=Homo sapiens GN=TTR PE=1 SV=1	HUMAN	1.1216
54	11.4	11.4	70.5	13	sp|P01842|LAC_HUMAN	Ig lambda chain C regions OS=Homo sapiens GN=IGLC1 PE=1 SV=1	HUMAN	1.1436
55	11	11.33	19	7	sp|Q06033|ITIH3_HUMAN	Inter-alpha-trypsin inhibitor heavy chain H3 OS=Homo sapiens GN=ITIH3 PE=1 SV=2	HUMAN	1.5833
56	10.4	10.4	24	5	sp|P08697|A2AP_HUMAN	Alpha-2-antiplasmin OS=Homo sapiens GN=SERPINF2 PE=1 SV=3	HUMAN	1.3107
57	10	10.02	19.4	5	sp|P27169|PON1_HUMAN	Serum paraoxonase/arylesterase 1 OS=Homo sapiens GN=PON1 PE=1 SV=2	HUMAN	1.0188
58	9.51	9.67	18.4	5	sp|P43652|AFAM_HUMAN	Afamin OS=Homo sapiens GN=AFM PE=1 SV=1	HUMAN	1.0426
59	9.45	9.45	12	6	sp|P01019|ANGT_HUMAN	Angiotensinogen OS=Homo sapiens GN=AGT PE=1 SV=1	HUMAN	1.6563
60	8.43	8.43	62	6	sp|P02652|APOA2_HUMAN	Apolipoprotein A-II OS=Homo sapiens GN=APOA2 PE=1 SV=1	HUMAN	1.0255
61	8.35	8.35	10.8	4	sp|P07225|PROS_HUMAN	Vitamin K-dependent protein S OS=Homo sapiens GN=PROS1 PE=1 SV=1	HUMAN	1.1462
62	8	8	54.5	4	sp|P02655|APOC2_HUMAN	Apolipoprotein C-II OS=Homo sapiens GN=APOC2 PE=1 SV=1	HUMAN	0.8439
63	7.51	7.51	10.8	3	sp|P13671|CO6_HUMAN	Complement component C6 OS=Homo sapiens GN=C6 PE=1 SV=3	HUMAN	1.7698
64	7.44	22.46	49.8	13	sp|P19652|A1AG2_HUMAN	Alpha-1-acid glycoprotein 2 OS=Homo sapiens GN=ORM2 PE=1 SV=2	HUMAN
65	6.38	12.23	38.8	6	sp|Q03591|FHR1_HUMAN	Complement factor H-related protein 1 OS=Homo sapiens GN=CFHR1 PE=1 SV=2	HUMAN	1.5364
66	6.24	6.24	31.9	3	sp|P01781|HV320_HUMAN	Ig heavy chain V-III region GAL OS=Homo sapiens PE=1 SV=1	HUMAN
67	6.01	6.01	52.7	6	sp|P18136|KV313_HUMAN	Ig kappa chain V-III region HIC OS=Homo sapiens PE=4 SV=1	HUMAN	1.3602
68	6.01	6.01	45.1	3	sp|P80748|LV302_HUMAN	Ig lambda chain V-III region LOI OS=Homo sapiens PE=1 SV=1	HUMAN	1.2653
69	6	6.64	18.3	3	sp|P51884|LUM_HUMAN	Lumican OS=Homo sapiens GN=LUM PE=1 SV=2	HUMAN	0.9799
70	6	6.03	11	3	sp|P29622|KAIN_HUMAN	Kallistatin OS=Homo sapiens GN=SERPINA4 PE=1 SV=3	HUMAN	0.8908
71	6	6	11.8	3	sp|P07357|CO8A_HUMAN	Complement component C8 alpha chain OS=Homo sapiens GN=C8A PE=1 SV=2	HUMAN	1.4743
72	6	6	11.8	3	sp|Q96PD5|PGRP2_HUMAN	N-acetylmuramoyl-L-alanine amidase OS=Homo sapiens GN=PGLYRP2 PE=1 SV=1	HUMAN	1.0392
73	6	6	39.5	4	sp|P68871|HBB_HUMAN	Hemoglobin subunit beta OS=Homo sapiens GN=HBB PE=1 SV=2	HUMAN	2.1095
74	6	6	25.6	3	sp|P01591|IGJ_HUMAN	Immunoglobulin J chain OS=Homo sapiens GN=IGJ PE=1 SV=3	HUMAN	1.2544
75	5.89	31.05	64.4	30	sp|P01877|IGHA2_HUMAN	Ig alpha-2 chain C region OS=Homo sapiens GN=IGHA2 PE=1 SV=3	HUMAN	1.2897
76	5.45	5.45	11.3	2	sp|P05156|CFAI_HUMAN	Complement factor I OS=Homo sapiens GN=CFI PE=1 SV=1	HUMAN	1.4163
77	4.75	4.75	34.4	2	sp|P02775|CXCL7_HUMAN	Platelet basic protein OS=Homo sapiens GN=PPBP PE=1 SV=3	HUMAN	1.0568
78	4.55	4.58	9	2	sp|P06681|CO2_HUMAN	Complement C2 OS=Homo sapiens GN=C2 PE=1 SV=2	HUMAN	1.519
79	4.55	4.55	9.9	2	sp|P00736|C1R_HUMAN	Complement C1r subcomponent OS=Homo sapiens GN=C1R PE=1 SV=2	HUMAN	1.2596
80	4.49	4.49	26.5	6	sp|P23083|HV103_HUMAN	Ig heavy chain V-I region V35 OS=Homo sapiens PE=1 SV=1	HUMAN	0.8108
81	4.13	4.14	13.2	2	sp|P35858|ALS_HUMAN	Insulin-like growth factor-binding protein complex acid labile chain OS=Homo sapiens GN=IGFALS PE=1 SV=1	HUMAN	1.0689
82	4.04	5.64	40	9	sp|P01766|HV305_HUMAN	Ig heavy chain V-III region BRO OS=Homo sapiens PE=1 SV=1	HUMAN
83	4.03	4.03	25.4	3	sp|P69905|HBA_HUMAN	Hemoglobin subunit alpha OS=Homo sapiens GN=HBA1 PE=1 SV=2	HUMAN	2.5498
84	4.01	4.01	5.8	2	sp|P23142|FBLN1_HUMAN	Fibulin-1 OS=Homo sapiens GN=FBLN1 PE=1 SV=4	HUMAN	1.1167
85	4	4	5.8	2	sp|Q08380|LG3BP_HUMAN	Galectin-3-binding protein OS=Homo sapiens GN=LGALS3BP PE=1 SV=1	HUMAN	1.4901
86	4	4	9.8	3	sp|P02741|CRP_HUMAN	C-reactive protein OS=Homo sapiens GN=CRP PE=1 SV=1	HUMAN	4.4409
87	4	4	33.3	5	sp|P02656|APOC3_HUMAN	Apolipoprotein C-III OS=Homo sapiens GN=APOC3 PE=1 SV=1	HUMAN	0.8279
88	3.71	3.71	13.6	2	sp|O14791|APOL1_HUMAN	Apolipoprotein L1 OS=Homo sapiens GN=APOL1 PE=1 SV=5	HUMAN	1.2634
89	3.52	5.52	12.8	3	sp|P05543|THBG_HUMAN	Thyroxine-binding globulin OS=Homo sapiens GN=SERPINA7 PE=1 SV=2	HUMAN	0.767
90	2.94	4.97	52.1	2	sp|P06309|KV205_HUMAN	Ig kappa chain V-II region GM607 (Fragment) OS=Homo sapiens PE=4 SV=1	HUMAN	1.3755
91	2.92	5.77	36.9	3	sp|P01768|HV307_HUMAN	Ig heavy chain V-III region CAM OS=Homo sapiens PE=1 SV=1	HUMAN
92	2.73	2.79	36.4	2	sp|P04431|KV123_HUMAN	Ig kappa chain V-I region Walker OS=Homo sapiens PE=4 SV=1	HUMAN
93	2.34	2.4	34.8	1	sp|P04433|KV309_HUMAN	Ig kappa chain V-III region VG (Fragment) OS=Homo sapiens PE=4 SV=1	HUMAN	1.302
94	2.24	2.24	23.3	1	sp|P05452|TETN_HUMAN	Tetranectin OS=Homo sapiens GN=CLEC3B PE=1 SV=2	HUMAN	1.0616
95	2.18	2.18	11.7	1	sp|O75636|FCN3_HUMAN	Ficolin-3 OS=Homo sapiens GN=FCN3 PE=1 SV=2	HUMAN	1.0404
96	2.06	2.06	7.1	1	sp|P03952|KLKB1_HUMAN	Plasma kallikrein OS=Homo sapiens GN=KLKB1 PE=1 SV=1	HUMAN
97	2.02	2.04	18.4	1	sp|P01625|KV402_HUMAN	Ig kappa chain V-IV region Len OS=Homo sapiens PE=1 SV=2	HUMAN	1.2528
98	2	5.55	41	4	sp|P01764|HV303_HUMAN	Ig heavy chain V-III region VH26 OS=Homo sapiens PE=1 SV=1	HUMAN
99	2	4.26	28.7	3	sp|P04430|KV122_HUMAN	Ig kappa chain V-I region BAN OS=Homo sapiens PE=1 SV=1	HUMAN
100	2	4.11	37.7	2	sp|P08519|APOA_HUMAN	Apolipoprotein(a) OS=Homo sapiens GN=LPA PE=1 SV=1	HUMAN	1.2581
101	2	4.03	47.4	2	sp|P06310|KV206_HUMAN	Ig kappa chain V-II region RPMI 6410 OS=Homo sapiens PE=4 SV=1	HUMAN
102	2	2.2	3.7	1	sp|Q04756|HGFA_HUMAN	Hepatocyte growth factor activator OS=Homo sapiens GN=HGFAC PE=1 SV=1	HUMAN	0.7976
103	2	2.11	7.8	2	RRRRRsp|Q9H943|CJ068_HUMAN	REVERSED Uncharacterized protein C10orf68 OS=Homo sapiens GN=C10orf68 PE=2 SV=1	HUMAN
104	2	2.02	8.4	1	sp|P09871|C1S_HUMAN	Complement C1s subcomponent OS=Homo sapiens GN=C1S PE=1 SV=1	HUMAN	1.6391
105	2	2.02	3.9	1	sp|Q8WUY3|PRUN2_HUMAN	Protein prune homolog 2 OS=Homo sapiens GN=PRUNE2 PE=2 SV=1	HUMAN
106	2	2.01	8.7	1	sp|P06732|KCRM_HUMAN	Creatine kinase M-type OS=Homo sapiens GN=CKM PE=1 SV=2	HUMAN	0.9415
107	2	2	10.5	1	sp|P07358|CO8B_HUMAN	Complement component C8 beta chain OS=Homo sapiens GN=C8B PE=1 SV=3	HUMAN	1.4291
108	2	2	11.4	1	sp|P08185|CBG_HUMAN	Corticosteroid-binding globulin OS=Homo sapiens GN=SERPINA6 PE=1 SV=1	HUMAN	1.2644
109	2	2	7.7	1	sp|P36955|PEDF_HUMAN	Pigment epithelium-derived factor OS=Homo sapiens GN=SERPINF1 PE=1 SV=3	HUMAN	1.5915
110	2	2	4	1	RRRRRsp|Q9Y620|RA54B_HUMAN	REVERSED DNA repair and recombination protein RAD54B OS=Homo sapiens GN=RAD54B PE=1 SV=1	HUMAN	1.5487
111	2	2	4	1	sp|P43251|BTD_HUMAN	Biotinidase OS=Homo sapiens GN=BTD PE=1 SV=1	HUMAN	0.9935
112	2	2	16.5	1	sp|P04208|LV106_HUMAN	Ig lambda chain V-I region WAH OS=Homo sapiens PE=1 SV=1	HUMAN	0.9878
113	2	2	6.9	1	sp|P02747|C1QC_HUMAN	Complement C1q subcomponent subunit C OS=Homo sapiens GN=C1QC PE=1 SV=3	HUMAN
114	2	2	2.5	1	sp|P04180|LCAT_HUMAN	Phosphatidylcholine-sterol acyltransferase OS=Homo sapiens GN=LCAT PE=1 SV=1	HUMAN	0.8554
115	2	2	6	1	sp|P02746|C1QB_HUMAN	Complement C1q subcomponent subunit B OS=Homo sapiens GN=C1QB PE=1 SV=2	HUMAN	1.1684
116	2	2	16.7	1	sp|P01714|LV301_HUMAN	Ig lambda chain V-III region SH OS=Homo sapiens PE=1 SV=1	HUMAN	1.0846
117	1.7	140.75	55.8	82	sp|P0C0L4|CO4A_HUMAN	Complement C4-A OS=Homo sapiens GN=C4A PE=1 SV=1	HUMAN
118	1.7	1.7	7.4	1	sp|O95445|APOM_HUMAN	Apolipoprotein M OS=Homo sapiens GN=APOM PE=1 SV=2	HUMAN	1.1451
119	1.4	2.26	20.5	1	sp|P01602|KV110_HUMAN	Ig kappa chain V-I region HK102 (Fragment) OS=Homo sapiens GN=IGKV1-5 PE=4 SV=1	HUMAN
120	1.3	2.26	22.2	1	sp|P01611|KV119_HUMAN	Ig kappa chain V-I region Wes OS=Homo sapiens PE=1 SV=1	HUMAN
121	1.22	1.22	5.6	0	sp|P08571|CD14_HUMAN	Monocyte differentiation antigen CD14 OS=Homo sapiens GN=CD14 PE=1 SV=2	HUMAN	1.8405
122	0.96	3.53	21.3	3	sp|P01762|HV301_HUMAN	Ig heavy chain V-III region TRO OS=Homo sapiens PE=1 SV=1	HUMAN
123	0.91	4.04	51	6	sp|P01621|KV303_HUMAN	Ig kappa chain V-III region NG9 (Fragment) OS=Homo sapiens PE=1 SV=1	HUMAN
124	0.89	5.55	41.7	3	sp|P01767|HV306_HUMAN	Ig heavy chain V-III region BUT OS=Homo sapiens PE=1 SV=1	HUMAN
125	0.85	0.85	4.8	0	RRRRRsp|O94913|PCF11_HUMAN	REVERSED Pre-mRNA cleavage complex 2 protein Pcf11 OS=Homo sapiens GN=PCF11 PE=1 SV=3	HUMAN
126	0.85	0.85	13.3	0	sp|P02654|APOC1_HUMAN	Apolipoprotein C-I OS=Homo sapiens GN=APOC1 PE=1 SV=1	HUMAN	0.7087

## Sheet: P2
								115 label: presurgical serum
								117 label: postsugical serum
CAS patient P2
N	Unused	Total	% Cov	Peptides(95%)	Accession #	Name	Species	117:115
1	151.8	151.8	63.4	90	sp|P01024|CO3_HUMAN	Complement C3 OS=Homo sapiens GN=C3 PE=1 SV=2	HUMAN	1.7518
2	127.45	127.46	58.1	85	sp|P01023|A2MG_HUMAN	Alpha-2-macroglobulin OS=Homo sapiens GN=A2M PE=1 SV=1	HUMAN	1.2162
3	100.61	100.61	69.1	70	sp|P02787|TRFE_HUMAN	Serotransferrin OS=Homo sapiens GN=TF PE=1 SV=2	HUMAN	1.479
4	84.92	84.92	71.9	70	sp|P02768|ALBU_HUMAN	Serum albumin OS=Homo sapiens GN=ALB PE=1 SV=2	HUMAN	0.0701
5	67.85	67.86	33.1	36	sp|P0C0L5|CO4B_HUMAN	Complement C4-B OS=Homo sapiens GN=C4B PE=1 SV=1	HUMAN	0.9703
6	56.01	56.01	65.3	55	sp|P01009|A1AT_HUMAN	Alpha-1-antitrypsin OS=Homo sapiens GN=SERPINA1 PE=1 SV=3	HUMAN	1.89
7	54.64	54.64	80.2	39	sp|P02647|APOA1_HUMAN	Apolipoprotein A-I OS=Homo sapiens GN=APOA1 PE=1 SV=1	HUMAN	0.724
8	51.73	51.75	36.5	31	sp|P00450|CERU_HUMAN	Ceruloplasmin OS=Homo sapiens GN=CP PE=1 SV=1	HUMAN	1.6255
9	46.66	46.66	73.9	42	sp|P01876|IGHA1_HUMAN	Ig alpha-1 chain C region OS=Homo sapiens GN=IGHA1 PE=1 SV=2	HUMAN	1.3638
10	44.87	44.88	71.2	37	sp|P00738|HPT_HUMAN	Haptoglobin OS=Homo sapiens GN=HP PE=1 SV=1	HUMAN	1.7875
11	44.47	44.47	54.2	28	sp|P01871|IGHM_HUMAN	Ig mu chain C region OS=Homo sapiens GN=IGHM PE=1 SV=3	HUMAN	1.0242
12	43.27	43.27	54.3	24	sp|P02790|HEMO_HUMAN	Hemopexin OS=Homo sapiens GN=HPX PE=1 SV=2	HUMAN	1.6208
13	41.95	42.03	10.8	19	sp|P04114|APOB_HUMAN	Apolipoprotein B-100 OS=Homo sapiens GN=APOB PE=1 SV=1	HUMAN	0.9315
14	34.19	34.19	15.7	17	sp|P02751|FINC_HUMAN	Fibronectin OS=Homo sapiens GN=FN1 PE=1 SV=3	HUMAN	1.274
15	30.95	30.95	67	20	sp|P01857|IGHG1_HUMAN	Ig gamma-1 chain C region OS=Homo sapiens GN=IGHG1 PE=1 SV=1	HUMAN	0.1341
16	27.2	27.23	25.5	12	sp|P08603|CFAH_HUMAN	Complement factor H OS=Homo sapiens GN=CFH PE=1 SV=4	HUMAN	1.333
17	26.55	26.55	54.2	21	sp|P02763|A1AG1_HUMAN	Alpha-1-acid glycoprotein 1 OS=Homo sapiens GN=ORM1 PE=1 SV=1	HUMAN	2.8166
18	25.92	25.92	36.4	15	sp|P01011|AACT_HUMAN	Alpha-1-antichymotrypsin OS=Homo sapiens GN=SERPINA3 PE=1 SV=2	HUMAN	3.0558
19	19.23	19.23	44.2	10	sp|P02649|APOE_HUMAN	Apolipoprotein E OS=Homo sapiens GN=APOE PE=1 SV=1	HUMAN	1.1252
20	18.41	18.42	15.6	8	sp|P19823|ITIH2_HUMAN	Inter-alpha-trypsin inhibitor heavy chain H2 OS=Homo sapiens GN=ITIH2 PE=1 SV=1	HUMAN	1.4113
21	16.26	16.28	31	8	sp|P02774|VTDB_HUMAN	Vitamin D-binding protein OS=Homo sapiens GN=GC PE=1 SV=1	HUMAN	1.3268
22	16	16	24.7	8	sp|P04217|A1BG_HUMAN	Alpha-1B-glycoprotein OS=Homo sapiens GN=A1BG PE=1 SV=3	HUMAN	1.5186
23	15.95	15.95	31.2	9	sp|P10909|CLUS_HUMAN	Clusterin OS=Homo sapiens GN=CLU PE=1 SV=1	HUMAN	1.221
24	15.74	15.74	95.3	25	sp|P01834|IGKC_HUMAN	Ig kappa chain C region OS=Homo sapiens GN=IGKC PE=1 SV=1	HUMAN	1.0763
25	15.7	15.84	19.1	8	sp|P01042|KNG1_HUMAN	Kininogen-1 OS=Homo sapiens GN=KNG1 PE=1 SV=2	HUMAN	1.6159
26	14.32	14.32	35.9	10	sp|P25311|ZA2G_HUMAN	Zinc-alpha-2-glycoprotein OS=Homo sapiens GN=AZGP1 PE=1 SV=1	HUMAN	1.7258
27	13.52	27.7	65.6	16	sp|P01859|IGHG2_HUMAN	Ig gamma-2 chain C region OS=Homo sapiens GN=IGHG2 PE=1 SV=2	HUMAN	0.3066
28	13.04	13.04	24	7	sp|P02765|FETUA_HUMAN	Alpha-2-HS-glycoprotein OS=Homo sapiens GN=AHSG PE=1 SV=1	HUMAN	1.3244
29	12.52	12.56	11.8	7	sp|P19827|ITIH1_HUMAN	Inter-alpha-trypsin inhibitor heavy chain H1 OS=Homo sapiens GN=ITIH1 PE=1 SV=3	HUMAN	1.4981
30	12.35	12.35	17.7	6	sp|P00751|CFAB_HUMAN	Complement factor B OS=Homo sapiens GN=CFB PE=1 SV=2	HUMAN	2.338
31	12.12	12.12	18.2	6	sp|P04004|VTNC_HUMAN	Vitronectin OS=Homo sapiens GN=VTN PE=1 SV=1	HUMAN	1.237
32	12	12	36.5	8	sp|P05090|APOD_HUMAN	Apolipoprotein D OS=Homo sapiens GN=APOD PE=1 SV=1	HUMAN	1.6594
33	11.7	11.7	75.2	14	sp|P01842|LAC_HUMAN	Ig lambda chain C regions OS=Homo sapiens GN=IGLC1 PE=1 SV=1	HUMAN	1.229
34	11.62	11.62	18.5	5	sp|P00747|PLMN_HUMAN	Plasminogen OS=Homo sapiens GN=PLG PE=1 SV=2	HUMAN	1.1808
35	11.31	11.31	31.5	6	sp|P01008|ANT3_HUMAN	Antithrombin-III OS=Homo sapiens GN=SERPINC1 PE=1 SV=1	HUMAN	1.988
36	11.24	11.25	22.5	5	sp|P00734|THRB_HUMAN	Prothrombin OS=Homo sapiens GN=F2 PE=1 SV=2	HUMAN	0.9517
37	10.48	10.48	13.2	5	sp|P05155|IC1_HUMAN	Plasma protease C1 inhibitor OS=Homo sapiens GN=SERPING1 PE=1 SV=2	HUMAN	1.1391
38	10.02	10.02	38.3	9	cont|000137	spt|P00760| Cationic trypsin precursor (EC 3.4.21.4) (Beta-trypsin) (Fragment) [Bos taurus (contaminant)]	Bos taurus (contaminant)	0.9652
39	9.71	9.71	15.1	4	sp|P04003|C4BPA_HUMAN	C4b-binding protein alpha chain OS=Homo sapiens GN=C4BPA PE=1 SV=2	HUMAN	1.0163
40	8.97	8.97	15.3	4	sp|Q14624|ITIH4_HUMAN	Inter-alpha-trypsin inhibitor heavy chain H4 OS=Homo sapiens GN=ITIH4 PE=1 SV=3	HUMAN	1.8809
41	8.56	8.56	23.3	3	sp|P02760|AMBP_HUMAN	Protein AMBP OS=Homo sapiens GN=AMBP PE=1 SV=1	HUMAN	1.2418
42	8.12	8.12	30.9	4	sp|P02753|RET4_HUMAN	Retinol-binding protein 4 OS=Homo sapiens GN=RBP4 PE=1 SV=3	HUMAN	1.3389
43	8.09	8.12	7.5	5	sp|P02671|FIBA_HUMAN	Fibrinogen alpha chain OS=Homo sapiens GN=FGA PE=1 SV=2	HUMAN	1.7407
44	8	8	44.1	4	sp|P80748|LV302_HUMAN	Ig lambda chain V-III region LOI OS=Homo sapiens PE=1 SV=1	HUMAN	0.9509
45	7.74	7.74	40	10	sp|P01766|HV305_HUMAN	Ig heavy chain V-III region BRO OS=Homo sapiens PE=1 SV=1	HUMAN
46	7.7	7.7	26	4	sp|P02652|APOA2_HUMAN	Apolipoprotein A-II OS=Homo sapiens GN=APOA2 PE=1 SV=1	HUMAN	0.3835
47	6.59	6.6	9.7	3	sp|P02748|CO9_HUMAN	Complement component C9 OS=Homo sapiens GN=C9 PE=1 SV=2	HUMAN	2.2418
48	6.53	6.54	25	3	sp|P06727|APOA4_HUMAN	Apolipoprotein A-IV OS=Homo sapiens GN=APOA4 PE=1 SV=3	HUMAN	1.0356
49	6.22	6.26	47	4	sp|P06309|KV205_HUMAN	Ig kappa chain V-II region GM607 (Fragment) OS=Homo sapiens PE=4 SV=1	HUMAN
50	6.14	6.14	24.6	4	sp|P02749|APOH_HUMAN	Beta-2-glycoprotein 1 OS=Homo sapiens GN=APOH PE=1 SV=3	HUMAN	1.7174
51	6.14	6.14	18.8	5	sp|P02743|SAMP_HUMAN	Serum amyloid P-component OS=Homo sapiens GN=APCS PE=1 SV=2	HUMAN	1.7502
52	6.02	6.02	56.2	2	sp|P35542|SAA4_HUMAN	Serum amyloid A-4 protein OS=Homo sapiens GN=SAA4 PE=1 SV=1	HUMAN	1.552
53	6.01	6.01	13.3	3	sp|P04196|HRG_HUMAN	Histidine-rich glycoprotein OS=Homo sapiens GN=HRG PE=1 SV=1	HUMAN	1.3624
54	6	6	42	9	sp|P01621|KV303_HUMAN	Ig kappa chain V-III region NG9 (Fragment) OS=Homo sapiens PE=1 SV=1	HUMAN	1.065
55	5.4	33.04	69.4	29	sp|P01877|IGHA2_HUMAN	Ig alpha-2 chain C region OS=Homo sapiens GN=IGHA2 PE=1 SV=3	HUMAN	1.12
56	5.15	5.22	3.7	2	sp|P01031|CO5_HUMAN	Complement C5 OS=Homo sapiens GN=C5 PE=1 SV=4	HUMAN	2.0254
57	4.92	4.92	31.6	10	sp|P23083|HV103_HUMAN	Ig heavy chain V-I region V35 OS=Homo sapiens PE=1 SV=1	HUMAN	1.6876
58	4.06	4.06	8.7	2	sp|P27169|PON1_HUMAN	Serum paraoxonase/arylesterase 1 OS=Homo sapiens GN=PON1 PE=1 SV=2	HUMAN	0.9758
59	4.05	4.05	41.8	2	sp|P02735|SAA_HUMAN	Serum amyloid A protein OS=Homo sapiens GN=SAA1 PE=1 SV=2	HUMAN	11.9635
60	4	4.85	31.9	3	sp|P01781|HV320_HUMAN	Ig heavy chain V-III region GAL OS=Homo sapiens PE=1 SV=1	HUMAN	0.806
61	4	4.05	7.9	2	sp|P08697|A2AP_HUMAN	Alpha-2-antiplasmin OS=Homo sapiens GN=SERPINF2 PE=1 SV=3	HUMAN	1.5956
62	4	4	21.8	2	sp|P69905|HBA_HUMAN	Hemoglobin subunit alpha OS=Homo sapiens GN=HBA1 PE=1 SV=2	HUMAN	1.5486
63	4	4	15.7	2	sp|P68871|HBB_HUMAN	Hemoglobin subunit beta OS=Homo sapiens GN=HBB PE=1 SV=2	HUMAN	1.208
64	4	4	33.3	4	sp|P02656|APOC3_HUMAN	Apolipoprotein C-III OS=Homo sapiens GN=APOC3 PE=1 SV=1	HUMAN	1.1238
65	4	4	17.8	7	sp|P01717|LV403_HUMAN	Ig lambda chain V-IV region Hil OS=Homo sapiens PE=1 SV=1	HUMAN	1.0439
66	3.71	3.71	8.4	2	sp|P07357|CO8A_HUMAN	Complement component C8 alpha chain OS=Homo sapiens GN=C8A PE=1 SV=2	HUMAN	1.4329
67	2.96	4.38	39.3	2	sp|P01768|HV307_HUMAN	Ig heavy chain V-III region CAM OS=Homo sapiens PE=1 SV=1	HUMAN
68	2.57	18.61	47.3	11	sp|P19652|A1AG2_HUMAN	Alpha-1-acid glycoprotein 2 OS=Homo sapiens GN=ORM2 PE=1 SV=2	HUMAN
69	2.16	2.16	14.6	1	sp|P01591|IGJ_HUMAN	Immunoglobulin J chain OS=Homo sapiens GN=IGJ PE=1 SV=3	HUMAN	1.0079
70	2.11	2.11	27.7	1	sp|P01700|LV102_HUMAN	Ig lambda chain V-I region HA OS=Homo sapiens PE=1 SV=1	HUMAN	0.9312
71	2.03	4.03	28.7	4	sp|P04430|KV122_HUMAN	Ig kappa chain V-I region BAN OS=Homo sapiens PE=1 SV=1	HUMAN	0.8648
72	2.02	2.04	26.3	2	sp|P01625|KV402_HUMAN	Ig kappa chain V-IV region Len OS=Homo sapiens PE=1 SV=2	HUMAN	0.959
73	2.01	4.05	28.5	2	sp|P06316|LV107_HUMAN	Ig lambda chain V-I region BL2 OS=Homo sapiens PE=2 SV=1	HUMAN
74	2.01	2.12	6.1	1	sp|P06396|GELS_HUMAN	Gelsolin OS=Homo sapiens GN=GSN PE=1 SV=1	HUMAN	0.8979
75	2	67.86	33.1	36	sp|P0C0L4|CO4A_HUMAN	Complement C4-A OS=Homo sapiens GN=C4A PE=1 SV=1	HUMAN	1.3024
76	2	11.66	31.8	7	cont|000097	gi|1351907|sp|P02769|ALBU_BOVIN Serum albumin precursor (Allergen Bos d 6) (BSA) [Bos taurus (contaminant)]	Bos taurus (contaminant)
77	2	6.03	36.8	3	sp|P06310|KV206_HUMAN	Ig kappa chain V-II region RPMI 6410 OS=Homo sapiens PE=4 SV=1	HUMAN
78	2	2.84	7.3	1	RRRRRsp|Q9H943|CJ068_HUMAN	REVERSED Uncharacterized protein C10orf68 OS=Homo sapiens GN=C10orf68 PE=2 SV=1	HUMAN
79	2	2.04	4.2	1	sp|Q06033|ITIH3_HUMAN	Inter-alpha-trypsin inhibitor heavy chain H3 OS=Homo sapiens GN=ITIH3 PE=1 SV=2	HUMAN	2.2732
80	2	2.04	28.7	1	sp|P01598|KV106_HUMAN	Ig kappa chain V-I region EU OS=Homo sapiens PE=1 SV=1	HUMAN	0.6187
81	2	2.03	22.2	2	sp|P01611|KV119_HUMAN	Ig kappa chain V-I region Wes OS=Homo sapiens PE=1 SV=1	HUMAN	0.7375
82	2	2.02	3.5	1	sp|P29622|KAIN_HUMAN	Kallistatin OS=Homo sapiens GN=SERPINA4 PE=1 SV=3	HUMAN	1.1738
83	2	2	5.1	1	sp|P04264|K2C1_HUMAN	Keratin, type II cytoskeletal 1 OS=Homo sapiens GN=KRT1 PE=1 SV=5	HUMAN	0.7686
84	2	2	6.5	1	sp|P00736|C1R_HUMAN	Complement C1r subcomponent OS=Homo sapiens GN=C1R PE=1 SV=2	HUMAN	0.5248
85	2	2	20.7	1	sp|P04434|KV310_HUMAN	Ig kappa chain V-III region VH (Fragment) OS=Homo sapiens PE=4 SV=1	HUMAN
86	2	2	9.5	1	sp|P02750|A2GL_HUMAN	Leucine-rich alpha-2-glycoprotein OS=Homo sapiens GN=LRG1 PE=1 SV=2	HUMAN	2.6845
87	2	2	11.7	1	sp|P02775|CXCL7_HUMAN	Platelet basic protein OS=Homo sapiens GN=PPBP PE=1 SV=3	HUMAN	2.7728
88	2	2	15.7	1	sp|P02766|TTHY_HUMAN	Transthyretin OS=Homo sapiens GN=TTR PE=1 SV=1	HUMAN	3.1272
89	2	2	3.5	1	sp|P01019|ANGT_HUMAN	Angiotensinogen OS=Homo sapiens GN=AGT PE=1 SV=1	HUMAN	0.7306
90	1.4	2.62	2.3	1	RRRRRsp|Q8IX12|CCAR1_HUMAN	REVERSED Cell division cycle and apoptosis regulator protein 1 OS=Homo sapiens GN=CCAR1 PE=1 SV=2	HUMAN
91	1.31	5.69	41	3	sp|P01764|HV303_HUMAN	Ig heavy chain V-III region VH26 OS=Homo sapiens PE=1 SV=1	HUMAN
92	1.22	20.73	56.3	14	sp|P01861|IGHG4_HUMAN	Ig gamma-4 chain C region OS=Homo sapiens GN=IGHG4 PE=1 SV=1	HUMAN
93	1.22	3.24	38	1	sp|P01719|LV501_HUMAN	Ig lambda chain V-V region DEL OS=Homo sapiens PE=1 SV=1	HUMAN
94	1.2	4	18.6	3	sp|P01760|HV105_HUMAN	Ig heavy chain V-I region WOL OS=Homo sapiens PE=1 SV=1	HUMAN

## Sheet: P3
								115 label: presurgical serum
								117 label: postsugical serum
CAS patient P3
N	Unused	Total	% Cov	Peptides(95%)	Accession #	Name	Species	117:115
1	174.68	174.68	61	102	sp|P01024|CO3_HUMAN	Complement C3 OS=Homo sapiens GN=C3 PE=1 SV=2	HUMAN	1.5975
2	132.22	132.22	58.8	81	sp|P01023|A2MG_HUMAN	Alpha-2-macroglobulin OS=Homo sapiens GN=A2M PE=1 SV=1	HUMAN	0.9392
3	89.77	89.77	71.8	56	sp|P02787|TRFE_HUMAN	Serotransferrin OS=Homo sapiens GN=TF PE=1 SV=2	HUMAN	1.0728
4	81.58	81.58	40.2	43	sp|P0C0L5|CO4B_HUMAN	Complement C4-B OS=Homo sapiens GN=C4B PE=1 SV=1	HUMAN	1.3292
5	73.14	73.14	70.1	61	sp|P01009|A1AT_HUMAN	Alpha-1-antitrypsin OS=Homo sapiens GN=SERPINA1 PE=1 SV=3	HUMAN	1.7606
6	70.59	70.6	45.4	38	sp|P00450|CERU_HUMAN	Ceruloplasmin OS=Homo sapiens GN=CP PE=1 SV=1	HUMAN	1.4443
7	66.86	66.86	89.9	54	sp|P02647|APOA1_HUMAN	Apolipoprotein A-I OS=Homo sapiens GN=APOA1 PE=1 SV=1	HUMAN	0.6095
8	57.7	57.8	12.4	27	sp|P04114|APOB_HUMAN	Apolipoprotein B-100 OS=Homo sapiens GN=APOB PE=1 SV=1	HUMAN	1.0735
9	51.95	52.14	78.1	35	sp|P00738|HPT_HUMAN	Haptoglobin OS=Homo sapiens GN=HP PE=1 SV=1	HUMAN	2.0868
10	42.94	42.94	60.6	23	sp|P02790|HEMO_HUMAN	Hemopexin OS=Homo sapiens GN=HPX PE=1 SV=2	HUMAN	0.8251
11	38.22	38.22	52	22	sp|P01871|IGHM_HUMAN	Ig mu chain C region OS=Homo sapiens GN=IGHM PE=1 SV=3	HUMAN	0.9611
12	34.38	34.38	65.7	24	sp|P01876|IGHA1_HUMAN	Ig alpha-1 chain C region OS=Homo sapiens GN=IGHA1 PE=1 SV=2	HUMAN	1.4449
13	32.39	32.39	39.5	18	sp|P01011|AACT_HUMAN	Alpha-1-antichymotrypsin OS=Homo sapiens GN=SERPINA3 PE=1 SV=2	HUMAN	2.4826
14	31.23	31.71	19.4	15	sp|P02751|FINC_HUMAN	Fibronectin OS=Homo sapiens GN=FN1 PE=1 SV=3	HUMAN	0.8545
15	29.14	29.14	36.8	14	sp|P02768|ALBU_HUMAN	Serum albumin OS=Homo sapiens GN=ALB PE=1 SV=2	HUMAN	4.3468
16	27.92	27.92	63.4	15	sp|P02649|APOE_HUMAN	Apolipoprotein E OS=Homo sapiens GN=APOE PE=1 SV=1	HUMAN	1.7583
17	27.63	27.63	55.1	13	sp|P06727|APOA4_HUMAN	Apolipoprotein A-IV OS=Homo sapiens GN=APOA4 PE=1 SV=3	HUMAN	0.5233
18	27.38	27.46	28.9	14	sp|P08603|CFAH_HUMAN	Complement factor H OS=Homo sapiens GN=CFH PE=1 SV=4	HUMAN	1.0329
19	25.5	25.51	40.7	13	sp|P02774|VTDB_HUMAN	Vitamin D-binding protein OS=Homo sapiens GN=GC PE=1 SV=1	HUMAN	1.1851
20	25.22	25.22	53.2	14	sp|P25311|ZA2G_HUMAN	Zinc-alpha-2-glycoprotein OS=Homo sapiens GN=AZGP1 PE=1 SV=1	HUMAN	1.3153
21	24.19	24.19	61.7	16	sp|P02763|A1AG1_HUMAN	Alpha-1-acid glycoprotein 1 OS=Homo sapiens GN=ORM1 PE=1 SV=1	HUMAN	2.35
22	24.09	24.09	22.3	12	sp|P19823|ITIH2_HUMAN	Inter-alpha-trypsin inhibitor heavy chain H2 OS=Homo sapiens GN=ITIH2 PE=1 SV=1	HUMAN	1.0016
23	22.46	22.46	25.9	11	sp|P00747|PLMN_HUMAN	Plasminogen OS=Homo sapiens GN=PLG PE=1 SV=2	HUMAN	1.1484
24	21.89	21.93	41.2	12	sp|P02760|AMBP_HUMAN	Protein AMBP OS=Homo sapiens GN=AMBP PE=1 SV=1	HUMAN	0.9309
25	20.78	20.78	28.8	12	sp|Q14624|ITIH4_HUMAN	Inter-alpha-trypsin inhibitor heavy chain H4 OS=Homo sapiens GN=ITIH4 PE=1 SV=3	HUMAN	1.6065
26	18.24	18.24	33.9	9	sp|P04217|A1BG_HUMAN	Alpha-1B-glycoprotein OS=Homo sapiens GN=A1BG PE=1 SV=3	HUMAN	1.3196
27	17.09	17.61	17.7	9	sp|P19827|ITIH1_HUMAN	Inter-alpha-trypsin inhibitor heavy chain H1 OS=Homo sapiens GN=ITIH1 PE=1 SV=3	HUMAN	1.1791
28	16.37	16.37	27.5	9	sp|P00751|CFAB_HUMAN	Complement factor B OS=Homo sapiens GN=CFB PE=1 SV=2	HUMAN	1.7764
29	16.05	16.05	12.9	9	sp|P02671|FIBA_HUMAN	Fibrinogen alpha chain OS=Homo sapiens GN=FGA PE=1 SV=2	HUMAN	1.6242
30	16	16	57.8	10	sp|P68871|HBB_HUMAN	Hemoglobin subunit beta OS=Homo sapiens GN=HBB PE=1 SV=2	HUMAN	10.7843
31	15.83	15.83	53.2	8	sp|P02753|RET4_HUMAN	Retinol-binding protein 4 OS=Homo sapiens GN=RBP4 PE=1 SV=3	HUMAN	0.901
32	15.59	15.59	33.2	7	sp|P01008|ANT3_HUMAN	Antithrombin-III OS=Homo sapiens GN=SERPINC1 PE=1 SV=1	HUMAN	1.6148
33	14.89	14.89	29.3	7	sp|P00734|THRB_HUMAN	Prothrombin OS=Homo sapiens GN=F2 PE=1 SV=2	HUMAN	0.6463
34	14.87	14.9	34.3	7	sp|P10909|CLUS_HUMAN	Clusterin OS=Homo sapiens GN=CLU PE=1 SV=1	HUMAN	1.2673
35	14.31	14.31	53.5	11	cont|000137	spt|P00760| Cationic trypsin precursor (EC 3.4.21.4) (Beta-trypsin) (Fragment) [Bos taurus (contaminant)]	Bos taurus (contaminant)	0.6852
36	14.14	14.34	27.5	9	sp|P02765|FETUA_HUMAN	Alpha-2-HS-glycoprotein OS=Homo sapiens GN=AHSG PE=1 SV=1	HUMAN	0.7705
37	14	14	18.3	7	sp|P04196|HRG_HUMAN	Histidine-rich glycoprotein OS=Homo sapiens GN=HRG PE=1 SV=1	HUMAN	0.8405
38	13.31	13.71	84	14	sp|P01834|IGKC_HUMAN	Ig kappa chain C region OS=Homo sapiens GN=IGKC PE=1 SV=1	HUMAN	1.3077
39	13.02	13.02	27.2	6	sp|P04004|VTNC_HUMAN	Vitronectin OS=Homo sapiens GN=VTN PE=1 SV=1	HUMAN	1.2332
40	12.59	12.59	45	8	sp|P05090|APOD_HUMAN	Apolipoprotein D OS=Homo sapiens GN=APOD PE=1 SV=1	HUMAN	1.0397
41	12.59	12.59	25	6	sp|P01019|ANGT_HUMAN	Angiotensinogen OS=Homo sapiens GN=AGT PE=1 SV=1	HUMAN	1.4592
42	12.33	12.33	14.3	6	sp|P01042|KNG1_HUMAN	Kininogen-1 OS=Homo sapiens GN=KNG1 PE=1 SV=2	HUMAN	1.0632
43	12.08	12.1	37.1	8	sp|P02749|APOH_HUMAN	Beta-2-glycoprotein 1 OS=Homo sapiens GN=APOH PE=1 SV=3	HUMAN	1.0737
44	11.18	11.18	19.4	5	sp|P04003|C4BPA_HUMAN	C4b-binding protein alpha chain OS=Homo sapiens GN=C4BPA PE=1 SV=2	HUMAN	1.1345
45	10.72	10.72	47	6	sp|P02652|APOA2_HUMAN	Apolipoprotein A-II OS=Homo sapiens GN=APOA2 PE=1 SV=1	HUMAN	0.5798
46	10.55	10.55	70.5	10	sp|P01842|LAC_HUMAN	Ig lambda chain C regions OS=Homo sapiens GN=IGLC1 PE=1 SV=1	HUMAN	1.3576
47	10.38	10.39	59.2	5	sp|P35542|SAA4_HUMAN	Serum amyloid A-4 protein OS=Homo sapiens GN=SAA4 PE=1 SV=1	HUMAN	1.9362
48	10.17	10.17	59.9	6	sp|P69905|HBA_HUMAN	Hemoglobin subunit alpha OS=Homo sapiens GN=HBA1 PE=1 SV=2	HUMAN	13.6648
49	9.03	9.03	24.2	5	sp|P02743|SAMP_HUMAN	Serum amyloid P-component OS=Homo sapiens GN=APCS PE=1 SV=2	HUMAN	1.6543
50	8.27	8.28	26.6	4	sp|P05155|IC1_HUMAN	Plasma protease C1 inhibitor OS=Homo sapiens GN=SERPING1 PE=1 SV=2	HUMAN	1.1595
51	8.25	8.25	20.2	4	sp|P02750|A2GL_HUMAN	Leucine-rich alpha-2-glycoprotein OS=Homo sapiens GN=LRG1 PE=1 SV=2	HUMAN	1.8514
52	8.01	8.04	12	4	sp|P02748|CO9_HUMAN	Complement component C9 OS=Homo sapiens GN=C9 PE=1 SV=2	HUMAN	1.651
53	8	8	47.5	4	sp|P02655|APOC2_HUMAN	Apolipoprotein C-II OS=Homo sapiens GN=APOC2 PE=1 SV=1	HUMAN	0.8162
54	7.3	7.3	17.2	4	sp|P51884|LUM_HUMAN	Lumican OS=Homo sapiens GN=LUM PE=1 SV=2	HUMAN	0.9818
55	7.16	7.19	72.1	3	sp|P02735|SAA_HUMAN	Serum amyloid A protein OS=Homo sapiens GN=SAA1 PE=1 SV=2	HUMAN	8.4122
56	7.15	7.19	29.8	3	sp|P08519|APOA_HUMAN	Apolipoprotein(a) OS=Homo sapiens GN=LPA PE=1 SV=1	HUMAN	1.7267
57	6.15	6.15	3.5	3	sp|P01031|CO5_HUMAN	Complement C5 OS=Homo sapiens GN=C5 PE=1 SV=4	HUMAN	1.5327
58	5.74	19.89	42.3	11	sp|P19652|A1AG2_HUMAN	Alpha-1-acid glycoprotein 2 OS=Homo sapiens GN=ORM2 PE=1 SV=2	HUMAN	1.4326
59	5.43	28.38	62.9	20	sp|P01877|IGHA2_HUMAN	Ig alpha-2 chain C region OS=Homo sapiens GN=IGHA2 PE=1 SV=3	HUMAN	1.0519
60	4.12	4.12	25.9	2	sp|P01781|HV320_HUMAN	Ig heavy chain V-III region GAL OS=Homo sapiens PE=1 SV=1	HUMAN
61	4	4	4.9	2	sp|P13671|CO6_HUMAN	Complement component C6 OS=Homo sapiens GN=C6 PE=1 SV=3	HUMAN	0.9579
62	4	4	29	6	sp|P01621|KV303_HUMAN	Ig kappa chain V-III region NG9 (Fragment) OS=Homo sapiens PE=1 SV=1	HUMAN	1.3103
63	4	4	33.3	5	sp|P02656|APOC3_HUMAN	Apolipoprotein C-III OS=Homo sapiens GN=APOC3 PE=1 SV=1	HUMAN	1.1694
64	3.56	3.56	30.6	4	sp|P80748|LV302_HUMAN	Ig lambda chain V-III region LOI OS=Homo sapiens PE=1 SV=1	HUMAN	2.43
65	3.1	3.14	6.5	1	sp|P10643|CO7_HUMAN	Complement component C7 OS=Homo sapiens GN=C7 PE=1 SV=2	HUMAN	0.6191
66	3.05	3.52	41.9	2	sp|P01764|HV303_HUMAN	Ig heavy chain V-III region VH26 OS=Homo sapiens PE=1 SV=1	HUMAN	1.1454
67	2.41	2.42	7.2	1	sp|Q06033|ITIH3_HUMAN	Inter-alpha-trypsin inhibitor heavy chain H3 OS=Homo sapiens GN=ITIH3 PE=1 SV=2	HUMAN	1.6051
68	2.11	2.11	13.8	1	sp|P00746|CFAD_HUMAN	Complement factor D OS=Homo sapiens GN=CFD PE=1 SV=5	HUMAN	0.8936
69	2.02	2.31	21.8	1	sp|P02766|TTHY_HUMAN	Transthyretin OS=Homo sapiens GN=TTR PE=1 SV=1	HUMAN	2.1289
70	2	2.72	5.4	2	RRRRRsp|Q9H943|CJ068_HUMAN	REVERSED Uncharacterized protein C10orf68 OS=Homo sapiens GN=C10orf68 PE=2 SV=1	HUMAN
71	2	2.03	3.5	1	sp|P29622|KAIN_HUMAN	Kallistatin OS=Homo sapiens GN=SERPINA4 PE=1 SV=3	HUMAN	0.777
72	2	2.01	5.5	1	sp|P01859|IGHG2_HUMAN	Ig gamma-2 chain C region OS=Homo sapiens GN=IGHG2 PE=1 SV=2	HUMAN	1.7279
73	2	2	24.8	5	sp|P04432|KV124_HUMAN	Ig kappa chain V-I region Daudi OS=Homo sapiens PE=4 SV=1	HUMAN	1.0201
74	1.7	1.7	4	1	sp|O43866|CD5L_HUMAN	CD5 antigen-like OS=Homo sapiens GN=CD5L PE=1 SV=1	HUMAN	0.9061
75	1.52	2.02	0.8	1	sp|O15027|SC16A_HUMAN	Protein transport protein Sec16A OS=Homo sapiens GN=SEC16A PE=1 SV=3	HUMAN
76	1.52	1.52	3.2	1	sp|P05546|HEP2_HUMAN	Heparin cofactor 2 OS=Homo sapiens GN=SERPIND1 PE=1 SV=3	HUMAN
77	1.25	1.29	6.8	0	sp|P07358|CO8B_HUMAN	Complement component C8 beta chain OS=Homo sapiens GN=C8B PE=1 SV=3	HUMAN	1.1285
78	1.23	2.03	34.2	2	sp|P01766|HV305_HUMAN	Ig heavy chain V-III region BRO OS=Homo sapiens PE=1 SV=1	HUMAN

## Sheet: P4
								114 label: presurgical serum
								116 label: postsugical serum
CAS patient P4
N	Unused	Total	% Cov	Peptides(95%)	Accession #	Name	Species	116:114
1	177.33	177.33	72.1	149	sp|P01024|CO3_HUMAN	Complement C3 OS=Homo sapiens GN=C3 PE=1 SV=2	HUMAN	1.8635
2	170.41	170.41	66.2	188	sp|P01023|A2MG_HUMAN	Alpha-2-macroglobulin OS=Homo sapiens GN=A2M PE=1 SV=1	HUMAN	1.1761
3	107.81	107.81	73.1	110	sp|P02787|TRFE_HUMAN	Serotransferrin OS=Homo sapiens GN=TF PE=1 SV=2	HUMAN	1.5048
4	93.07	93.12	21.4	55	sp|P04114|APOB_HUMAN	Apolipoprotein B-100 OS=Homo sapiens GN=APOB PE=1 SV=1	HUMAN	1.2945
5	91.59	91.59	45.5	65	sp|P0C0L5|CO4B_HUMAN	Complement C4-B OS=Homo sapiens GN=C4B PE=1 SV=1	HUMAN	1.3294
6	69.6	69.62	53.6	52	sp|P00450|CERU_HUMAN	Ceruloplasmin OS=Homo sapiens GN=CP PE=1 SV=1	HUMAN	1.6142
7	69.16	69.2	51.3	45	sp|P08603|CFAH_HUMAN	Complement factor H OS=Homo sapiens GN=CFH PE=1 SV=4	HUMAN	1.6629
8	68.76	68.97	68.7	93	sp|P01009|A1AT_HUMAN	Alpha-1-antitrypsin OS=Homo sapiens GN=SERPINA1 PE=1 SV=3	HUMAN	2.9676
9	56.85	56.85	89.5	75	sp|P02647|APOA1_HUMAN	Apolipoprotein A-I OS=Homo sapiens GN=APOA1 PE=1 SV=1	HUMAN	0.9276
10	52.83	53.02	25.5	33	sp|P02751|FINC_HUMAN	Fibronectin OS=Homo sapiens GN=FN1 PE=1 SV=3	HUMAN	0.576
11	51.5	51.55	78.1	54	sp|P00738|HPT_HUMAN	Haptoglobin OS=Homo sapiens GN=HP PE=1 SV=1	HUMAN	2.2088
12	48.83	48.83	51.8	54	sp|P01871|IGHM_HUMAN	Ig mu chain C region OS=Homo sapiens GN=IGHM PE=1 SV=3	HUMAN	1.118
13	44	44	57.5	60	sp|P01876|IGHA1_HUMAN	Ig alpha-1 chain C region OS=Homo sapiens GN=IGHA1 PE=1 SV=2	HUMAN	2.3307
14	42.21	42.21	59.7	40	sp|P02790|HEMO_HUMAN	Hemopexin OS=Homo sapiens GN=HPX PE=1 SV=2	HUMAN	1.0356
15	41.93	41.93	51.9	31	sp|P02768|ALBU_HUMAN	Serum albumin OS=Homo sapiens GN=ALB PE=1 SV=2	HUMAN	0.6709
16	37.61	37.61	38.9	24	sp|P00751|CFAB_HUMAN	Complement factor B OS=Homo sapiens GN=CFB PE=1 SV=2	HUMAN	2.404
17	36.1	36.11	32.7	24	sp|Q14624|ITIH4_HUMAN	Inter-alpha-trypsin inhibitor heavy chain H4 OS=Homo sapiens GN=ITIH4 PE=1 SV=3	HUMAN	1.8718
18	35.65	35.65	44	30	sp|P01011|AACT_HUMAN	Alpha-1-antichymotrypsin OS=Homo sapiens GN=SERPINA3 PE=1 SV=2	HUMAN	5.3489
19	33.75	33.75	58	26	sp|P02649|APOE_HUMAN	Apolipoprotein E OS=Homo sapiens GN=APOE PE=1 SV=1	HUMAN	2.0031
20	30.64	30.64	59.7	27	sp|P02763|A1AG1_HUMAN	Alpha-1-acid glycoprotein 1 OS=Homo sapiens GN=ORM1 PE=1 SV=1	HUMAN	4.8374
21	30.18	30.29	42.8	18	sp|P02774|VTDB_HUMAN	Vitamin D-binding protein OS=Homo sapiens GN=GC PE=1 SV=1	HUMAN	1.5875
22	25.72	25.72	37	16	sp|P04004|VTNC_HUMAN	Vitronectin OS=Homo sapiens GN=VTN PE=1 SV=1	HUMAN	2.0463
23	25.14	25.15	33.3	17	sp|P00747|PLMN_HUMAN	Plasminogen OS=Homo sapiens GN=PLG PE=1 SV=2	HUMAN	0.9865
24	22.6	22.6	30.3	15	sp|P01042|KNG1_HUMAN	Kininogen-1 OS=Homo sapiens GN=KNG1 PE=1 SV=2	HUMAN	1.6557
25	22.43	22.43	61.3	24	cont|000137	spt|P00760| Cationic trypsin precursor (EC 3.4.21.4) (Beta-trypsin) (Fragment) [Bos taurus (contaminant)]	Bos taurus (contaminant)	2.2062
26	22.4	22.4	39.2	13	sp|P04217|A1BG_HUMAN	Alpha-1B-glycoprotein OS=Homo sapiens GN=A1BG PE=1 SV=3	HUMAN	1.1312
27	21.87	21.87	45.7	12	sp|P01008|ANT3_HUMAN	Antithrombin-III OS=Homo sapiens GN=SERPINC1 PE=1 SV=1	HUMAN	1.6719
28	21.24	21.24	38.1	14	sp|P10909|CLUS_HUMAN	Clusterin OS=Homo sapiens GN=CLU PE=1 SV=1	HUMAN	1.6089
29	21.19	21.19	43.7	16	sp|P06727|APOA4_HUMAN	Apolipoprotein A-IV OS=Homo sapiens GN=APOA4 PE=1 SV=3	HUMAN	0.9136
30	20.14	20.14	19.2	17	sp|P19823|ITIH2_HUMAN	Inter-alpha-trypsin inhibitor heavy chain H2 OS=Homo sapiens GN=ITIH2 PE=1 SV=1	HUMAN	0.7696
31	19.99	19.99	50.5	14	sp|P25311|ZA2G_HUMAN	Zinc-alpha-2-glycoprotein OS=Homo sapiens GN=AZGP1 PE=1 SV=1	HUMAN	1.7131
32	19.69	19.69	46.6	17	sp|P00734|THRB_HUMAN	Prothrombin OS=Homo sapiens GN=F2 PE=1 SV=2	HUMAN	0.8565
33	19.39	19.49	10.9	9	sp|P01031|CO5_HUMAN	Complement C5 OS=Homo sapiens GN=C5 PE=1 SV=4	HUMAN	1.6801
34	18.08	18.08	28.8	12	sp|P05155|IC1_HUMAN	Plasma protease C1 inhibitor OS=Homo sapiens GN=SERPING1 PE=1 SV=2	HUMAN	0.8365
35	17.78	17.78	30.3	15	sp|P02765|FETUA_HUMAN	Alpha-2-HS-glycoprotein OS=Homo sapiens GN=AHSG PE=1 SV=1	HUMAN	0.966
36	17.01	17.01	24.8	12	sp|P04003|C4BPA_HUMAN	C4b-binding protein alpha chain OS=Homo sapiens GN=C4BPA PE=1 SV=2	HUMAN	1.5639
37	16.78	16.78	12.6	10	sp|P02671|FIBA_HUMAN	Fibrinogen alpha chain OS=Homo sapiens GN=FGA PE=1 SV=2	HUMAN	1.1326
38	15.76	15.76	40.4	9	sp|P02750|A2GL_HUMAN	Leucine-rich alpha-2-glycoprotein OS=Homo sapiens GN=LRG1 PE=1 SV=2	HUMAN	2.6696
39	15.7	16.49	17.3	11	sp|P19827|ITIH1_HUMAN	Inter-alpha-trypsin inhibitor heavy chain H1 OS=Homo sapiens GN=ITIH1 PE=1 SV=3	HUMAN	0.8591
40	15.39	15.39	37.5	13	sp|P02760|AMBP_HUMAN	Protein AMBP OS=Homo sapiens GN=AMBP PE=1 SV=1	HUMAN	1.1527
41	14.88	14.88	95.3	24	sp|P01834|IGKC_HUMAN	Ig kappa chain C region OS=Homo sapiens GN=IGKC PE=1 SV=1	HUMAN	1.8801
42	14.05	14.05	70.5	16	sp|P01842|LAC_HUMAN	Ig lambda chain C regions OS=Homo sapiens GN=IGLC1 PE=1 SV=1	HUMAN	2.2315
43	13.02	13.02	73.8	8	sp|P02735|SAA_HUMAN	Serum amyloid A protein OS=Homo sapiens GN=SAA1 PE=1 SV=2	HUMAN	9.2478
44	12.92	12.92	48.3	13	sp|P68871|HBB_HUMAN	Hemoglobin subunit beta OS=Homo sapiens GN=HBB PE=1 SV=2	HUMAN	1.7539
45	12.67	12.67	30.5	9	sp|P04196|HRG_HUMAN	Histidine-rich glycoprotein OS=Homo sapiens GN=HRG PE=1 SV=1	HUMAN	0.5908
46	12.03	12.03	43.9	8	sp|P05090|APOD_HUMAN	Apolipoprotein D OS=Homo sapiens GN=APOD PE=1 SV=1	HUMAN	1.7344
47	12	12.01	26.5	10	sp|P02743|SAMP_HUMAN	Serum amyloid P-component OS=Homo sapiens GN=APCS PE=1 SV=2	HUMAN	2.0775
48	11.46	11.81	53.9	5	sp|P35542|SAA4_HUMAN	Serum amyloid A-4 protein OS=Homo sapiens GN=SAA4 PE=1 SV=1	HUMAN	2.5558
49	10.31	10.31	52.5	11	sp|P01766|HV305_HUMAN	Ig heavy chain V-III region BRO OS=Homo sapiens PE=1 SV=1	HUMAN	1.5627
50	10.03	10.03	22.3	7	sp|P27169|PON1_HUMAN	Serum paraoxonase/arylesterase 1 OS=Homo sapiens GN=PON1 PE=1 SV=2	HUMAN	1.1844
51	9.86	9.88	14.2	5	sp|P43652|AFAM_HUMAN	Afamin OS=Homo sapiens GN=AFM PE=1 SV=1	HUMAN	1.8644
52	9.66	9.66	21	6	sp|P08697|A2AP_HUMAN	Alpha-2-antiplasmin OS=Homo sapiens GN=SERPINF2 PE=1 SV=3	HUMAN	1.1629
53	8.2	8.22	26.8	3	sp|P10643|CO7_HUMAN	Complement component C7 OS=Homo sapiens GN=C7 PE=1 SV=2	HUMAN	1.0338
54	8.17	8.17	11	4	sp|P05546|HEP2_HUMAN	Heparin cofactor 2 OS=Homo sapiens GN=SERPIND1 PE=1 SV=3	HUMAN	0.9591
55	8.13	8.13	39.4	6	sp|P69905|HBA_HUMAN	Hemoglobin subunit alpha OS=Homo sapiens GN=HBA1 PE=1 SV=2	HUMAN	2.4151
56	8.08	8.08	23.7	4	sp|P02741|CRP_HUMAN	C-reactive protein OS=Homo sapiens GN=CRP PE=1 SV=1	HUMAN	1.4336
57	8	8.02	26	4	sp|P29622|KAIN_HUMAN	Kallistatin OS=Homo sapiens GN=SERPINA4 PE=1 SV=3	HUMAN	0.794
58	7.44	7.46	17.2	4	sp|P02748|CO9_HUMAN	Complement component C9 OS=Homo sapiens GN=C9 PE=1 SV=2	HUMAN	2.2473
59	6.95	6.95	9.3	2	sp|P04275|VWF_HUMAN	von Willebrand factor OS=Homo sapiens GN=VWF PE=1 SV=2	HUMAN	2.4851
60	6.87	7.06	55.8	4	sp|P02766|TTHY_HUMAN	Transthyretin OS=Homo sapiens GN=TTR PE=1 SV=1	HUMAN	0.9932
61	6.43	6.43	65	5	sp|P02652|APOA2_HUMAN	Apolipoprotein A-II OS=Homo sapiens GN=APOA2 PE=1 SV=1	HUMAN	0.613
62	6.14	6.22	32.9	4	sp|P08519|APOA_HUMAN	Apolipoprotein(a) OS=Homo sapiens GN=LPA PE=1 SV=1	HUMAN	0.5743
63	6	12	29.7	9	sp|Q03591|FHR1_HUMAN	Complement factor H-related protein 1 OS=Homo sapiens GN=CFHR1 PE=1 SV=2	HUMAN	1.1224
64	6	6	15.1	8	sp|P02749|APOH_HUMAN	Beta-2-glycoprotein 1 OS=Homo sapiens GN=APOH PE=1 SV=3	HUMAN	0.9778
65	6	6	24.8	3	sp|P01825|HV207_HUMAN	Ig heavy chain V-II region NEWM OS=Homo sapiens PE=1 SV=1	HUMAN	1.5989
66	6	6	25.6	5	sp|P01591|IGJ_HUMAN	Immunoglobulin J chain OS=Homo sapiens GN=IGJ PE=1 SV=3	HUMAN	0.954
67	5.95	5.95	17.3	2	sp|O43866|CD5L_HUMAN	CD5 antigen-like OS=Homo sapiens GN=CD5L PE=1 SV=1	HUMAN	1.7387
68	5.91	5.93	14.7	3	sp|Q06033|ITIH3_HUMAN	Inter-alpha-trypsin inhibitor heavy chain H3 OS=Homo sapiens GN=ITIH3 PE=1 SV=2	HUMAN	1.5612
69	5.76	5.76	14.6	4	sp|P01019|ANGT_HUMAN	Angiotensinogen OS=Homo sapiens GN=AGT PE=1 SV=1	HUMAN	1.0201
70	5.22	5.22	22.1	2	sp|O75636|FCN3_HUMAN	Ficolin-3 OS=Homo sapiens GN=FCN3 PE=1 SV=2	HUMAN	1.8424
71	4.94	35.1	62.1	41	sp|P01877|IGHA2_HUMAN	Ig alpha-2 chain C region OS=Homo sapiens GN=IGHA2 PE=1 SV=3	HUMAN
72	4.75	4.76	13.8	3	sp|P06396|GELS_HUMAN	Gelsolin OS=Homo sapiens GN=GSN PE=1 SV=1	HUMAN	0.7985
73	4.62	4.62	31	4	sp|P04431|KV123_HUMAN	Ig kappa chain V-I region Walker OS=Homo sapiens PE=4 SV=1	HUMAN
74	4.62	4.62	15.4	2	sp|P04278|SHBG_HUMAN	Sex hormone-binding globulin OS=Homo sapiens GN=SHBG PE=1 SV=2	HUMAN	0.7425
75	4.49	4.49	15.2	2	sp|P13671|CO6_HUMAN	Complement component C6 OS=Homo sapiens GN=C6 PE=1 SV=3	HUMAN	1.5181
76	4.31	9.47	55.7	6	sp|P01768|HV307_HUMAN	Ig heavy chain V-III region CAM OS=Homo sapiens PE=1 SV=1	HUMAN
77	4.3	4.3	39.3	11	sp|P23083|HV103_HUMAN	Ig heavy chain V-I region V35 OS=Homo sapiens PE=1 SV=1	HUMAN	1.1266
78	4.25	4.25	42.6	2	sp|P04207|KV308_HUMAN	Ig kappa chain V-III region CLL OS=Homo sapiens PE=1 SV=2	HUMAN
79	4.24	27.14	57.5	22	sp|P00739|HPTR_HUMAN	Haptoglobin-related protein OS=Homo sapiens GN=HPR PE=2 SV=1	HUMAN
80	4.24	4.24	13.2	2	sp|P01861|IGHG4_HUMAN	Ig gamma-4 chain C region OS=Homo sapiens GN=IGHG4 PE=1 SV=1	HUMAN	2.1114
81	4.21	4.21	14.2	2	sp|P51884|LUM_HUMAN	Lumican OS=Homo sapiens GN=LUM PE=1 SV=2	HUMAN	0.942
82	4.17	4.19	10.3	2	sp|P07358|CO8B_HUMAN	Complement component C8 beta chain OS=Homo sapiens GN=C8B PE=1 SV=3	HUMAN	1.556
83	4.13	4.16	73	5	sp|P01621|KV303_HUMAN	Ig kappa chain V-III region NG9 (Fragment) OS=Homo sapiens PE=1 SV=1	HUMAN	1.5082
84	4.05	4.05	37.8	3	sp|P80748|LV302_HUMAN	Ig lambda chain V-III region LOI OS=Homo sapiens PE=1 SV=1	HUMAN
85	4.01	4.01	13.6	1	sp|P03952|KLKB1_HUMAN	Plasma kallikrein OS=Homo sapiens GN=KLKB1 PE=1 SV=1	HUMAN	0.9784
86	4	4.16	29.6	3	sp|P04433|KV309_HUMAN	Ig kappa chain V-III region VG (Fragment) OS=Homo sapiens PE=4 SV=1	HUMAN	0.8372
87	4	4	17.8	4	sp|P01717|LV403_HUMAN	Ig lambda chain V-IV region Hil OS=Homo sapiens PE=1 SV=1	HUMAN	1.0373
88	4	4	16.3	2	sp|P05452|TETN_HUMAN	Tetranectin OS=Homo sapiens GN=CLEC3B PE=1 SV=2	HUMAN	0.4701
89	4	4	33.3	5	sp|P02656|APOC3_HUMAN	Apolipoprotein C-III OS=Homo sapiens GN=APOC3 PE=1 SV=1	HUMAN	0.7931
90	3.83	39.42	18.6	28	sp|P20742|PZP_HUMAN	Pregnancy zone protein OS=Homo sapiens GN=PZP PE=1 SV=3	HUMAN	0.8215
91	3.76	3.76	15.5	2	sp|Q96PD5|PGRP2_HUMAN	N-acetylmuramoyl-L-alanine amidase OS=Homo sapiens GN=PGLYRP2 PE=1 SV=1	HUMAN	0.6675
92	3.7	3.77	8.2	2	sp|P68133|ACTS_HUMAN	Actin, alpha skeletal muscle OS=Homo sapiens GN=ACTA1 PE=1 SV=1	HUMAN	2.0199
93	3.55	4.03	28.1	4	sp|P01625|KV402_HUMAN	Ig kappa chain V-IV region Len OS=Homo sapiens PE=1 SV=2	HUMAN	1.7467
94	3.52	17.6	43.8	11	sp|P19652|A1AG2_HUMAN	Alpha-1-acid glycoprotein 2 OS=Homo sapiens GN=ORM2 PE=1 SV=2	HUMAN	2.2791
95	3.52	3.52	11.7	2	sp|O95445|APOM_HUMAN	Apolipoprotein M OS=Homo sapiens GN=APOM PE=1 SV=2	HUMAN	0.756
96	3.47	3.47	9.5	3	sp|O14791|APOL1_HUMAN	Apolipoprotein L1 OS=Homo sapiens GN=APOL1 PE=1 SV=5	HUMAN	1.4326
97	3.37	3.73	9.8	1	sp|P18428|LBP_HUMAN	Lipopolysaccharide-binding protein OS=Homo sapiens GN=LBP PE=1 SV=3	HUMAN	3.0675
98	3.36	3.36	27.2	1	sp|P07360|CO8G_HUMAN	Complement component C8 gamma chain OS=Homo sapiens GN=C8G PE=1 SV=3	HUMAN	1.3321
99	3.24	3.24	6.9	1	sp|P08185|CBG_HUMAN	Corticosteroid-binding globulin OS=Homo sapiens GN=SERPINA6 PE=1 SV=1	HUMAN	1.1333
100	3.15	9.81	54.8	6	sp|P01767|HV306_HUMAN	Ig heavy chain V-III region BUT OS=Homo sapiens PE=1 SV=1	HUMAN	1.7956
101	2.8	2.8	5.3	1	sp|P55058|PLTP_HUMAN	Phospholipid transfer protein OS=Homo sapiens GN=PLTP PE=1 SV=1	HUMAN	1.7036
102	2.49	2.49	7.1	1	sp|P00736|C1R_HUMAN	Complement C1r subcomponent OS=Homo sapiens GN=C1R PE=1 SV=2	HUMAN	1.7035
103	2.48	2.48	55.1	1	sp|P04208|LV106_HUMAN	Ig lambda chain V-I region WAH OS=Homo sapiens PE=1 SV=1	HUMAN	1.2742
104	2.31	2.49	11	1	sp|P06681|CO2_HUMAN	Complement C2 OS=Homo sapiens GN=C2 PE=1 SV=2	HUMAN	1.3115
105	2.17	8.36	48.3	4	sp|P01781|HV320_HUMAN	Ig heavy chain V-III region GAL OS=Homo sapiens PE=1 SV=1	HUMAN
106	2.17	4.17	13.3	2	sp|P05543|THBG_HUMAN	Thyroxine-binding globulin OS=Homo sapiens GN=SERPINA7 PE=1 SV=2	HUMAN	1.0257
107	2.16	2.17	5	1	sp|P05156|CFAI_HUMAN	Complement factor I OS=Homo sapiens GN=CFI PE=1 SV=1	HUMAN	1.8277
108	2.11	7.64	47.9	8	sp|P01764|HV303_HUMAN	Ig heavy chain V-III region VH26 OS=Homo sapiens PE=1 SV=1	HUMAN
109	2.11	2.2	41	2	sp|P06309|KV205_HUMAN	Ig kappa chain V-II region GM607 (Fragment) OS=Homo sapiens PE=4 SV=1	HUMAN
110	2.03	2.03	7.2	1	sp|P08571|CD14_HUMAN	Monocyte differentiation antigen CD14 OS=Homo sapiens GN=CD14 PE=1 SV=2	HUMAN	1.9064
111	2.01	31.63	49.6	33	sp|P04220|MUCB_HUMAN	Ig mu heavy chain disease protein OS=Homo sapiens PE=1 SV=1	HUMAN
112	2	91.59	45.5	64	sp|P0C0L4|CO4A_HUMAN	Complement C4-A OS=Homo sapiens GN=C4A PE=1 SV=1	HUMAN	1.2691
113	2	4.23	35.8	3	sp|P01624|KV306_HUMAN	Ig kappa chain V-III region POM OS=Homo sapiens PE=1 SV=1	HUMAN
114	2	2.64	26.9	2	sp|P04430|KV122_HUMAN	Ig kappa chain V-I region BAN OS=Homo sapiens PE=1 SV=1	HUMAN
115	2	2.62	20.5	1	sp|P01602|KV110_HUMAN	Ig kappa chain V-I region HK102 (Fragment) OS=Homo sapiens GN=IGKV1-5 PE=4 SV=1	HUMAN	1.7099
116	2	2.07	25.9	1	sp|P01616|KV203_HUMAN	Ig kappa chain V-II region MIL OS=Homo sapiens PE=1 SV=1	HUMAN	1.0762
117	2	2.03	9	1	sp|P00488|F13A_HUMAN	Coagulation factor XIII A chain OS=Homo sapiens GN=F13A1 PE=1 SV=4	HUMAN	0.9156
118	2	2.03	7.6	1	sp|P05154|IPSP_HUMAN	Plasma serine protease inhibitor OS=Homo sapiens GN=SERPINA5 PE=1 SV=2	HUMAN	0.5021
119	2	2.02	31.5	1	sp|P01719|LV501_HUMAN	Ig lambda chain V-V region DEL OS=Homo sapiens PE=1 SV=1	HUMAN
120	2	2	15.6	2	sp|Q96IY4|CBPB2_HUMAN	Carboxypeptidase B2 OS=Homo sapiens GN=CPB2 PE=1 SV=1	HUMAN
121	2	2	5.1	1	RRRRRsp|Q9Y620|RA54B_HUMAN	REVERSED DNA repair and recombination protein RAD54B OS=Homo sapiens GN=RAD54B PE=1 SV=1	HUMAN	0.668
122	2	2	5.2	1	sp|Q14520|HABP2_HUMAN	Hyaluronan-binding protein 2 OS=Homo sapiens GN=HABP2 PE=1 SV=1	HUMAN	0.9764
123	2	2	19.5	1	sp|P22352|GPX3_HUMAN	Glutathione peroxidase 3 OS=Homo sapiens GN=GPX3 PE=1 SV=2	HUMAN	1.5309
124	2	2	10.8	1	sp|P02746|C1QB_HUMAN	Complement C1q subcomponent subunit B OS=Homo sapiens GN=C1QB PE=1 SV=2	HUMAN	1.3555
125	2	2	4.6	1	sp|Q08380|LG3BP_HUMAN	Galectin-3-binding protein OS=Homo sapiens GN=LGALS3BP PE=1 SV=1	HUMAN	1.0183
126	2	2	6.9	2	sp|P02747|C1QC_HUMAN	Complement C1q subcomponent subunit C OS=Homo sapiens GN=C1QC PE=1 SV=3	HUMAN	1.3224
127	2	2	24.1	2	sp|P01714|LV301_HUMAN	Ig lambda chain V-III region SH OS=Homo sapiens PE=1 SV=1	HUMAN	1.1388
128	2	2	1.2	1	sp|P07225|PROS_HUMAN	Vitamin K-dependent protein S OS=Homo sapiens GN=PROS1 PE=1 SV=1	HUMAN	0.936
129	1.85	3.7	34.9	3	sp|P01772|HV311_HUMAN	Ig heavy chain V-III region KOL OS=Homo sapiens PE=1 SV=1	HUMAN	1.284
130	1.76	1.76	6.4	1	sp|P18850|ATF6A_HUMAN	Cyclic AMP-dependent transcription factor ATF-6 alpha OS=Homo sapiens GN=ATF6 PE=1 SV=3	HUMAN
131	1.75	3.58	4.1	1	RRRRRsp|Q8WZ42|TITIN_HUMAN	REVERSED Titin OS=Homo sapiens GN=TTN PE=1 SV=2	HUMAN
132	1.66	2.44	5.6	1	RRRRRsp|Q14980|NUMA1_HUMAN	REVERSED Nuclear mitotic apparatus protein 1 OS=Homo sapiens GN=NUMA1 PE=1 SV=2	HUMAN
133	1.64	1.84	1	0	RRRRRsp|Q8IZA0|K319L_HUMAN	REVERSED Uncharacterized protein KIAA0319-like OS=Homo sapiens GN=KIAA0319L PE=1 SV=2	HUMAN

## Sheet: P5
								115 label: presurgical serum
CAS patient P5								117 label: postsugical serum
N	Unused	Total	% Cov	Peptides(95%)	Accession #	Name	Species	117:115
1	207.79	207.79	72.9	130	sp|P01024|CO3_HUMAN	Complement C3 OS=Homo sapiens GN=C3 PE=1 SV=2	HUMAN	1.0951
2	196.08	196.08	74	147	sp|P01023|A2MG_HUMAN	Alpha-2-macroglobulin OS=Homo sapiens GN=A2M PE=1 SV=1	HUMAN	1.0433
3	180.6	180.6	29.1	98	sp|P04114|APOB_HUMAN	Apolipoprotein B-100 OS=Homo sapiens GN=APOB PE=1 SV=1	HUMAN	1.0727
4	150.13	150.14	81	137	sp|P02787|TRFE_HUMAN	Serotransferrin OS=Homo sapiens GN=TF PE=1 SV=2	HUMAN	0.7692
5	115.95	115.96	61.6	72	sp|P00450|CERU_HUMAN	Ceruloplasmin OS=Homo sapiens GN=CP PE=1 SV=1	HUMAN	1.4003
6	85.68	85.78	91.4	98	sp|P02647|APOA1_HUMAN	Apolipoprotein A-I OS=Homo sapiens GN=APOA1 PE=1 SV=1	HUMAN	1.0665
7	83.16	83.87	71.8	90	sp|P01009|A1AT_HUMAN	Alpha-1-antitrypsin OS=Homo sapiens GN=SERPINA1 PE=1 SV=3	HUMAN	1.2825
8	82.89	82.89	46.6	47	sp|P08603|CFAH_HUMAN	Complement factor H OS=Homo sapiens GN=CFH PE=1 SV=4	HUMAN	1.0714
9	80.31	80.31	38.9	40	sp|P0C0L5|CO4B_HUMAN	Complement C4-B OS=Homo sapiens GN=C4B PE=1 SV=1	HUMAN	1.758
10	71.25	71.27	28	35	sp|P02751|FINC_HUMAN	Fibronectin OS=Homo sapiens GN=FN1 PE=1 SV=3	HUMAN	0.8247
11	67.9	67.9	68.3	78	sp|P01876|IGHA1_HUMAN	Ig alpha-1 chain C region OS=Homo sapiens GN=IGHA1 PE=1 SV=2	HUMAN	1.1036
12	62.86	62.86	60.9	33	sp|P02768|ALBU_HUMAN	Serum albumin OS=Homo sapiens GN=ALB PE=1 SV=2	HUMAN	1.6079
13	57.12	57.12	66.9	35	sp|P02790|HEMO_HUMAN	Hemopexin OS=Homo sapiens GN=HPX PE=1 SV=2	HUMAN	0.9412
14	52.52	52.54	77.3	36	sp|P00738|HPT_HUMAN	Haptoglobin OS=Homo sapiens GN=HP PE=1 SV=1	HUMAN	0.0938
15	51.04	51.15	69.8	25	sp|P02774|VTDB_HUMAN	Vitamin D-binding protein OS=Homo sapiens GN=GC PE=1 SV=1	HUMAN	1.1751
16	46.68	46.68	45.2	22	sp|P00751|CFAB_HUMAN	Complement factor B OS=Homo sapiens GN=CFB PE=1 SV=2	HUMAN	1.2452
17	43.97	43.97	42.8	25	sp|P01011|AACT_HUMAN	Alpha-1-antichymotrypsin OS=Homo sapiens GN=SERPINA3 PE=1 SV=2	HUMAN	1.7133
18	41.18	41.18	50.8	20	sp|P00734|THRB_HUMAN	Prothrombin OS=Homo sapiens GN=F2 PE=1 SV=2	HUMAN	1.0519
19	39.53	39.53	76	22	sp|P02649|APOE_HUMAN	Apolipoprotein E OS=Homo sapiens GN=APOE PE=1 SV=1	HUMAN	1.1261
20	38.98	38.99	31.7	20	sp|Q14624|ITIH4_HUMAN	Inter-alpha-trypsin inhibitor heavy chain H4 OS=Homo sapiens GN=ITIH4 PE=1 SV=3	HUMAN	1.1714
21	36.96	36.99	30.3	21	sp|P19823|ITIH2_HUMAN	Inter-alpha-trypsin inhibitor heavy chain H2 OS=Homo sapiens GN=ITIH2 PE=1 SV=1	HUMAN	1.1882
22	34.89	34.98	37.9	16	sp|P00747|PLMN_HUMAN	Plasminogen OS=Homo sapiens GN=PLG PE=1 SV=2	HUMAN	1.0466
23	34.64	34.64	51.9	17	sp|P01008|ANT3_HUMAN	Antithrombin-III OS=Homo sapiens GN=SERPINC1 PE=1 SV=1	HUMAN	1.1716
24	33.15	33.15	35.3	17	sp|P01042|KNG1_HUMAN	Kininogen-1 OS=Homo sapiens GN=KNG1 PE=1 SV=2	HUMAN	1.1237
25	28.47	28.47	57.2	28	sp|P02763|A1AG1_HUMAN	Alpha-1-acid glycoprotein 1 OS=Homo sapiens GN=ORM1 PE=1 SV=1	HUMAN	2.0678
26	26.62	26.62	38.4	13	sp|P04217|A1BG_HUMAN	Alpha-1B-glycoprotein OS=Homo sapiens GN=A1BG PE=1 SV=3	HUMAN	1.1162
27	25.71	25.71	37.6	17	sp|P02765|FETUA_HUMAN	Alpha-2-HS-glycoprotein OS=Homo sapiens GN=AHSG PE=1 SV=1	HUMAN	0.6904
28	24.01	24.02	26	13	sp|P05155|IC1_HUMAN	Plasma protease C1 inhibitor OS=Homo sapiens GN=SERPING1 PE=1 SV=2	HUMAN	1.4899
29	23.9	23.92	27.7	14	sp|P19827|ITIH1_HUMAN	Inter-alpha-trypsin inhibitor heavy chain H1 OS=Homo sapiens GN=ITIH1 PE=1 SV=3	HUMAN	1.1994
30	23.52	23.52	32.3	15	sp|P10909|CLUS_HUMAN	Clusterin OS=Homo sapiens GN=CLU PE=1 SV=1	HUMAN	0.9882
31	22.48	22.48	72	13	cont|000137	spt|P00760| Cationic trypsin precursor (EC 3.4.21.4) (Beta-trypsin) (Fragment) [Bos taurus (contaminant)]	Bos taurus (contaminant)	0.9401
32	22.22	22.23	31.6	11	sp|P04004|VTNC_HUMAN	Vitronectin OS=Homo sapiens GN=VTN PE=1 SV=1	HUMAN	1.042
33	22	22.1	44.6	13	sp|P02749|APOH_HUMAN	Beta-2-glycoprotein 1 OS=Homo sapiens GN=APOH PE=1 SV=3	HUMAN	1.208
34	21.29	21.29	24.1	12	sp|P04003|C4BPA_HUMAN	C4b-binding protein alpha chain OS=Homo sapiens GN=C4BPA PE=1 SV=2	HUMAN	1.0818
35	21.25	21.25	46.5	10	sp|P06727|APOA4_HUMAN	Apolipoprotein A-IV OS=Homo sapiens GN=APOA4 PE=1 SV=3	HUMAN	1.0578
36	16.68	16.68	26.1	9	sp|P04196|HRG_HUMAN	Histidine-rich glycoprotein OS=Homo sapiens GN=HRG PE=1 SV=1	HUMAN	0.9461
37	16.48	16.57	9.2	8	sp|P01031|CO5_HUMAN	Complement C5 OS=Homo sapiens GN=C5 PE=1 SV=4	HUMAN	1.3013
38	16	16.03	38.3	9	sp|P25311|ZA2G_HUMAN	Zinc-alpha-2-glycoprotein OS=Homo sapiens GN=AZGP1 PE=1 SV=1	HUMAN	1.4128
39	15.43	15.75	29.1	8	sp|P43652|AFAM_HUMAN	Afamin OS=Homo sapiens GN=AFM PE=1 SV=1	HUMAN	0.9465
40	14.28	14.28	18.7	7	sp|P10643|CO7_HUMAN	Complement component C7 OS=Homo sapiens GN=C7 PE=1 SV=2	HUMAN	1.0312
41	14.16	14.16	88.7	23	sp|P01834|IGKC_HUMAN	Ig kappa chain C region OS=Homo sapiens GN=IGKC PE=1 SV=1	HUMAN	1.1611
42	14	14	49.7	8	sp|P68871|HBB_HUMAN	Hemoglobin subunit beta OS=Homo sapiens GN=HBB PE=1 SV=2	HUMAN	1.1075
43	13.88	13.93	69.2	6	sp|P35542|SAA4_HUMAN	Serum amyloid A-4 protein OS=Homo sapiens GN=SAA4 PE=1 SV=1	HUMAN	1.2558
44	13.76	13.77	23.3	8	sp|P01019|ANGT_HUMAN	Angiotensinogen OS=Homo sapiens GN=AGT PE=1 SV=1	HUMAN	1.2433
45	13.7	13.7	70.5	17	sp|P01842|LAC_HUMAN	Ig lambda chain C regions OS=Homo sapiens GN=IGLC1 PE=1 SV=1	HUMAN	1.0699
46	12.6	12.6	38.1	7	sp|P05090|APOD_HUMAN	Apolipoprotein D OS=Homo sapiens GN=APOD PE=1 SV=1	HUMAN	1.3889
47	12.47	12.47	47	9	sp|P02652|APOA2_HUMAN	Apolipoprotein A-II OS=Homo sapiens GN=APOA2 PE=1 SV=1	HUMAN	0.7152
48	12.42	12.42	25.4	6	sp|Q96PD5|PGRP2_HUMAN	N-acetylmuramoyl-L-alanine amidase OS=Homo sapiens GN=PGLYRP2 PE=1 SV=1	HUMAN	1.0162
49	12.05	12.16	15.4	7	sp|P02748|CO9_HUMAN	Complement component C9 OS=Homo sapiens GN=C9 PE=1 SV=2	HUMAN	1.2323
50	12.01	12.01	22.4	7	sp|P01871|IGHM_HUMAN	Ig mu chain C region OS=Homo sapiens GN=IGHM PE=1 SV=3	HUMAN	1.2158
51	11.54	11.54	25	5	sp|P02760|AMBP_HUMAN	Protein AMBP OS=Homo sapiens GN=AMBP PE=1 SV=1	HUMAN	1.1656
52	10.97	10.97	29.4	5	sp|P02750|A2GL_HUMAN	Leucine-rich alpha-2-glycoprotein OS=Homo sapiens GN=LRG1 PE=1 SV=2	HUMAN	1.6196
53	10.28	10.28	50	8	sp|P01768|HV307_HUMAN	Ig heavy chain V-III region CAM OS=Homo sapiens PE=1 SV=1	HUMAN	1.3468
54	10	10	54.5	5	sp|P02655|APOC2_HUMAN	Apolipoprotein C-II OS=Homo sapiens GN=APOC2 PE=1 SV=1	HUMAN	0.9953
55	8.73	8.76	72.1	4	sp|P02735|SAA_HUMAN	Serum amyloid A protein OS=Homo sapiens GN=SAA1 PE=1 SV=2	HUMAN	2.186
56	8.71	8.71	71.3	6	sp|P18136|KV313_HUMAN	Ig kappa chain V-III region HIC OS=Homo sapiens PE=4 SV=1	HUMAN	1.2134
57	8.39	8.39	17.1	4	sp|P08697|A2AP_HUMAN	Alpha-2-antiplasmin OS=Homo sapiens GN=SERPINF2 PE=1 SV=3	HUMAN	1.022
58	8.28	8.38	16.6	5	sp|P05546|HEP2_HUMAN	Heparin cofactor 2 OS=Homo sapiens GN=SERPIND1 PE=1 SV=3	HUMAN	0.5611
59	7.4	51.74	70.9	52	sp|P01877|IGHA2_HUMAN	Ig alpha-2 chain C region OS=Homo sapiens GN=IGHA2 PE=1 SV=3	HUMAN	0.9785
60	6.49	6.49	7.5	3	sp|P13671|CO6_HUMAN	Complement component C6 OS=Homo sapiens GN=C6 PE=1 SV=3	HUMAN	1.3469
61	6.35	6.35	11	3	sp|P06396|GELS_HUMAN	Gelsolin OS=Homo sapiens GN=GSN PE=1 SV=1	HUMAN	0.9651
62	6.15	6.4	13.9	2	sp|Q06033|ITIH3_HUMAN	Inter-alpha-trypsin inhibitor heavy chain H3 OS=Homo sapiens GN=ITIH3 PE=1 SV=2	HUMAN	1.0862
63	6.12	36.39	26.1	21	sp|P20742|PZP_HUMAN	Pregnancy zone protein OS=Homo sapiens GN=PZP PE=1 SV=3	HUMAN	1.2956
64	6.02	8.72	50	4	sp|P01781|HV320_HUMAN	Ig heavy chain V-III region GAL OS=Homo sapiens PE=1 SV=1	HUMAN	0.8669
65	6	6	15.6	3	sp|P00748|FA12_HUMAN	Coagulation factor XII OS=Homo sapiens GN=F12 PE=1 SV=2	HUMAN	0.7145
66	6	6	16.1	4	sp|P02743|SAMP_HUMAN	Serum amyloid P-component OS=Homo sapiens GN=APCS PE=1 SV=2	HUMAN	1.0302
67	6	6	24.1	3	sp|P02654|APOC1_HUMAN	Apolipoprotein C-I OS=Homo sapiens GN=APOC1 PE=1 SV=1	HUMAN	0.8973
68	5.3	5.4	55.8	8	sp|P04431|KV123_HUMAN	Ig kappa chain V-I region Walker OS=Homo sapiens PE=4 SV=1	HUMAN
69	5.1	20.8	43.8	20	sp|P19652|A1AG2_HUMAN	Alpha-1-acid glycoprotein 2 OS=Homo sapiens GN=ORM2 PE=1 SV=2	HUMAN	1.5246
70	4.43	6.59	52.1	3	sp|P06309|KV205_HUMAN	Ig kappa chain V-II region GM607 (Fragment) OS=Homo sapiens PE=4 SV=1	HUMAN
71	4.32	4.32	11.2	2	sp|P01857|IGHG1_HUMAN	Ig gamma-1 chain C region OS=Homo sapiens GN=IGHG1 PE=1 SV=1	HUMAN	1.5314
72	4.28	4.28	9.6	2	sp|P05156|CFAI_HUMAN	Complement factor I OS=Homo sapiens GN=CFI PE=1 SV=1	HUMAN	1.1992
73	4.03	4.03	15.8	2	sp|P27169|PON1_HUMAN	Serum paraoxonase/arylesterase 1 OS=Homo sapiens GN=PON1 PE=1 SV=2	HUMAN	0.9755
74	4.03	4.03	25.4	3	sp|P69905|HBA_HUMAN	Hemoglobin subunit alpha OS=Homo sapiens GN=HBA1 PE=1 SV=2	HUMAN	1.1722
75	4.01	4.02	15.4	2	sp|P35858|ALS_HUMAN	Insulin-like growth factor-binding protein complex acid labile chain OS=Homo sapiens GN=IGFALS PE=1 SV=1	HUMAN	0.799
76	4	6	16.1	3	sp|Q03591|FHR1_HUMAN	Complement factor H-related protein 1 OS=Homo sapiens GN=CFHR1 PE=1 SV=2	HUMAN	1.378
77	4	4.1	4.7	2	sp|P07225|PROS_HUMAN	Vitamin K-dependent protein S OS=Homo sapiens GN=PROS1 PE=1 SV=1	HUMAN	1.1371
78	4	4.05	6.5	2	sp|P02671|FIBA_HUMAN	Fibrinogen alpha chain OS=Homo sapiens GN=FGA PE=1 SV=2	HUMAN	1.2583
79	4	4	11.3	2	sp|P04264|K2C1_HUMAN	Keratin, type II cytoskeletal 1 OS=Homo sapiens GN=KRT1 PE=1 SV=5	HUMAN	0.9407
80	4	4	11.2	2	sp|P29622|KAIN_HUMAN	Kallistatin OS=Homo sapiens GN=SERPINA4 PE=1 SV=3	HUMAN	1.0484
81	4	4	24.5	3	sp|P02766|TTHY_HUMAN	Transthyretin OS=Homo sapiens GN=TTR PE=1 SV=1	HUMAN	0.942
82	4	4	33.3	5	sp|P02656|APOC3_HUMAN	Apolipoprotein C-III OS=Homo sapiens GN=APOC3 PE=1 SV=1	HUMAN	0.7947
83	4	4	17.8	4	sp|P01717|LV403_HUMAN	Ig lambda chain V-IV region Hil OS=Homo sapiens PE=1 SV=1	HUMAN	0.9397
84	4	4	14.6	2	sp|P01591|IGJ_HUMAN	Immunoglobulin J chain OS=Homo sapiens GN=IGJ PE=1 SV=3	HUMAN	1.4186
85	3.71	8.08	41.9	7	sp|P01764|HV303_HUMAN	Ig heavy chain V-III region VH26 OS=Homo sapiens PE=1 SV=1	HUMAN
86	3.7	6.86	73	6	sp|P01621|KV303_HUMAN	Ig kappa chain V-III region NG9 (Fragment) OS=Homo sapiens PE=1 SV=1	HUMAN
87	3.51	3.51	22.2	7	sp|P23083|HV103_HUMAN	Ig heavy chain V-I region V35 OS=Homo sapiens PE=1 SV=1	HUMAN	0.3964
88	3.09	3.12	34.2	1	sp|P01625|KV402_HUMAN	Ig kappa chain V-IV region Len OS=Homo sapiens PE=1 SV=2	HUMAN	1.1295
89	3.08	3.08	36.3	1	sp|P02753|RET4_HUMAN	Retinol-binding protein 4 OS=Homo sapiens GN=RBP4 PE=1 SV=3	HUMAN	0.9388
90	2.85	4.97	52.7	2	sp|P04207|KV308_HUMAN	Ig kappa chain V-III region CLL OS=Homo sapiens PE=1 SV=2	HUMAN
91	2.38	6.17	45.9	4	sp|P06310|KV206_HUMAN	Ig kappa chain V-II region RPMI 6410 OS=Homo sapiens PE=4 SV=1	HUMAN
92	2.34	2.34	23.9	1	sp|P04208|LV106_HUMAN	Ig lambda chain V-I region WAH OS=Homo sapiens PE=1 SV=1	HUMAN	1.1446
93	2.21	2.21	23.9	1	sp|P01825|HV207_HUMAN	Ig heavy chain V-II region NEWM OS=Homo sapiens PE=1 SV=1	HUMAN	1.1013
94	2.11	2.11	7.4	2	sp|O95445|APOM_HUMAN	Apolipoprotein M OS=Homo sapiens GN=APOM PE=1 SV=2	HUMAN	0.9454
95	2.07	2.07	13.3	1	sp|O14791|APOL1_HUMAN	Apolipoprotein L1 OS=Homo sapiens GN=APOL1 PE=1 SV=5	HUMAN	0.6084
96	2.05	2.05	35.9	1	sp|P02775|CXCL7_HUMAN	Platelet basic protein OS=Homo sapiens GN=PPBP PE=1 SV=3	HUMAN	0.9353
97	2.03	2.1	4	2	RRRRRsp|Q9H943|CJ068_HUMAN	REVERSED Uncharacterized protein C10orf68 OS=Homo sapiens GN=C10orf68 PE=2 SV=1	HUMAN
98	2.02	2.02	37.8	1	sp|P80748|LV302_HUMAN	Ig lambda chain V-III region LOI OS=Homo sapiens PE=1 SV=1	HUMAN	1.4742
99	2.01	4.13	5.1	1	RRRRRsp|P46939|UTRO_HUMAN	REVERSED Utrophin OS=Homo sapiens GN=UTRN PE=1 SV=2	HUMAN
100	2	5.44	38.9	5	sp|P04430|KV122_HUMAN	Ig kappa chain V-I region BAN OS=Homo sapiens PE=1 SV=1	HUMAN
101	2	4	14	2	sp|P05543|THBG_HUMAN	Thyroxine-binding globulin OS=Homo sapiens GN=SERPINA7 PE=1 SV=2	HUMAN
102	2	3.64	39.8	2	sp|P01606|KV114_HUMAN	Ig kappa chain V-I region OU OS=Homo sapiens PE=1 SV=1	HUMAN
103	2	2.55	28.7	1	sp|P04433|KV309_HUMAN	Ig kappa chain V-III region VG (Fragment) OS=Homo sapiens PE=4 SV=1	HUMAN	1.5561
104	2	2.14	9.5	1	sp|P51884|LUM_HUMAN	Lumican OS=Homo sapiens GN=LUM PE=1 SV=2	HUMAN	1.0883
105	2	2.14	8.4	1	sp|P05154|IPSP_HUMAN	Plasma serine protease inhibitor OS=Homo sapiens GN=SERPINA5 PE=1 SV=2	HUMAN	1.2774
106	2	2.11	4.7	1	RRRRRsp|Q6ZP82|CC141_HUMAN	REVERSED Coiled-coil domain-containing protein 141 OS=Homo sapiens GN=CCDC141 PE=2 SV=1	HUMAN	1.0501
107	2	2.05	5.2	1	RRRRRsp|Q9H2U1|DHX36_HUMAN	REVERSED Probable ATP-dependent RNA helicase DHX36 OS=Homo sapiens GN=DHX36 PE=1 SV=1	HUMAN
108	2	2.03	4.2	1	sp|P09871|C1S_HUMAN	Complement C1s subcomponent OS=Homo sapiens GN=C1S PE=1 SV=1	HUMAN	1.188
109	2	2.01	6.6	1	sp|P06732|KCRM_HUMAN	Creatine kinase M-type OS=Homo sapiens GN=CKM PE=1 SV=2	HUMAN	0.8065
