# Supplementary material for: Monitoring of Serial Presurgical and Postsurgical Changes in the Serum Proteome in a Series of Patients with Calcific Aortic Stenosis
Source: Dis Markers. 2015 May 20;2015:694120. doi: 10.1155/2015/694120 (PMC4452854; doi:10.1155/2015/694120)
Supplement: Supplementary file 2 [file 694120.f2.xlsx]

## Sheet: N1
Supplementary Table 2. Raw proteomic data of two time points [second time point (T2) vs. first time point (T1)] with a 14-day interval in 4 healthy volunteers (N1-N4) after FDR analyses.
								114 label: T1 serum
								116 label: T2 serum
Healthy volunteer N1
N	Unused	Total	% Cov	Peptides(95%)	Accession #	Name	Species	116:114
1	258.43	258.43	72	165	sp|P01024|CO3_HUMAN	Complement C3 OS=Homo sapiens GN=C3 PE=1 SV=2	HUMAN	1.0362
2	238.92	238.92	79.8	178	sp|P02787|TRFE_HUMAN	Serotransferrin OS=Homo sapiens GN=TF PE=1 SV=2	HUMAN	1.1838
3	184.51	184.51	59.8	131	sp|P01023|A2MG_HUMAN	Alpha-2-macroglobulin OS=Homo sapiens GN=A2M PE=1 SV=1	HUMAN	0.9176
4	176.07	176.08	31.7	97	sp|P04114|APOB_HUMAN	Apolipoprotein B-100 OS=Homo sapiens GN=APOB PE=1 SV=1	HUMAN	0.9329
5	120.87	120.87	45.8	66	sp|P0C0L5|CO4B_HUMAN	Complement C4-B OS=Homo sapiens GN=C4B PE=1 SV=1	HUMAN
6	105.67	105.67	69.9	85	sp|P01009|A1AT_HUMAN	Alpha-1-antitrypsin OS=Homo sapiens GN=SERPINA1 PE=1 SV=3	HUMAN	0.8173
7	98.94	98.94	91	72	sp|P02647|APOA1_HUMAN	Apolipoprotein A-I OS=Homo sapiens GN=APOA1 PE=1 SV=1	HUMAN	0.5571
8	88.6	88.61	77.8	76	sp|P00738|HPT_HUMAN	Haptoglobin OS=Homo sapiens GN=HP PE=1 SV=1	HUMAN	0.9487
9	88.59	88.64	56	56	sp|P00450|CERU_HUMAN	Ceruloplasmin OS=Homo sapiens GN=CP PE=1 SV=1	HUMAN	0.9207
10	81.25	81.3	46.1	44	sp|P08603|CFAH_HUMAN	Complement factor H OS=Homo sapiens GN=CFH PE=1 SV=4	HUMAN	0.9762
11	74.24	74.24	56.3	51	sp|P02790|HEMO_HUMAN	Hemopexin OS=Homo sapiens GN=HPX PE=1 SV=2	HUMAN	0.7962
12	58.75	58.75	46.5	49	sp|P01876|IGHA1_HUMAN	Ig alpha-1 chain C region OS=Homo sapiens GN=IGHA1 PE=1 SV=2	HUMAN	0.8553
13	58.37	58.37	41.5	31	sp|P19823|ITIH2_HUMAN	Inter-alpha-trypsin inhibitor heavy chain H2 OS=Homo sapiens GN=ITIH2 PE=1 SV=1	HUMAN	1.0361
14	55.71	55.71	37.6	28	sp|P01042|KNG1_HUMAN	Kininogen-1 OS=Homo sapiens GN=KNG1 PE=1 SV=2	HUMAN	1.0462
15	53.78	53.78	89.1	73	sp|P68871|HBB_HUMAN	Hemoglobin subunit beta OS=Homo sapiens GN=HBB PE=1 SV=2	HUMAN	1.1411
16	52.81	52.81	57.2	30	sp|P00734|THRB_HUMAN	Prothrombin OS=Homo sapiens GN=F2 PE=1 SV=2	HUMAN	0.9656
17	52.8	52.8	46.1	27	sp|P00747|PLMN_HUMAN	Plasminogen OS=Homo sapiens GN=PLG PE=1 SV=2	HUMAN	0.8792
18	52.18	52.19	43.5	29	sp|P00751|CFAB_HUMAN	Complement factor B OS=Homo sapiens GN=CFB PE=1 SV=2	HUMAN	0.9293
19	48.23	48.25	59.5	26	sp|P02774|VTDB_HUMAN	Vitamin D-binding protein OS=Homo sapiens GN=GC PE=1 SV=1	HUMAN	0.9782
20	46.61	46.7	68.7	29	cont|000137	spt|P00760| Cationic trypsin precursor (EC 3.4.21.4) (Beta-trypsin) (Fragment) [Bos taurus (contaminant)]	Bos taurus (contaminant)	1.1152
21	46.47	46.47	36.4	29	sp|P19827|ITIH1_HUMAN	Inter-alpha-trypsin inhibitor heavy chain H1 OS=Homo sapiens GN=ITIH1 PE=1 SV=3	HUMAN	0.9641
22	46.41	46.41	52.9	34	sp|P01871|IGHM_HUMAN	Ig mu chain C region OS=Homo sapiens GN=IGHM PE=1 SV=3	HUMAN	0.7907
23	42.61	42.61	49.8	21	sp|P06727|APOA4_HUMAN	Apolipoprotein A-IV OS=Homo sapiens GN=APOA4 PE=1 SV=3	HUMAN	0.7524
24	40.77	40.77	70.4	57	sp|P69905|HBA_HUMAN	Hemoglobin subunit alpha OS=Homo sapiens GN=HBA1 PE=1 SV=2	HUMAN	1.3601
25	36.3	36.3	32.6	29	sp|P04004|VTNC_HUMAN	Vitronectin OS=Homo sapiens GN=VTN PE=1 SV=1	HUMAN	0.9846
26	35.91	35.91	51.5	17	sp|P01008|ANT3_HUMAN	Antithrombin-III OS=Homo sapiens GN=SERPINC1 PE=1 SV=1	HUMAN	0.9534
27	34.85	34.85	42.8	23	sp|P02765|FETUA_HUMAN	Alpha-2-HS-glycoprotein OS=Homo sapiens GN=AHSG PE=1 SV=1	HUMAN	1.0914
28	33.54	33.54	30.7	19	sp|P04217|A1BG_HUMAN	Alpha-1B-glycoprotein OS=Homo sapiens GN=A1BG PE=1 SV=3	HUMAN	0.8486
29	33.48	34.34	27.1	20	sp|Q14624|ITIH4_HUMAN	Inter-alpha-trypsin inhibitor heavy chain H4 OS=Homo sapiens GN=ITIH4 PE=1 SV=3	HUMAN	1.0162
30	30.62	30.62	45	18	sp|P10909|CLUS_HUMAN	Clusterin OS=Homo sapiens GN=CLU PE=1 SV=1	HUMAN	0.7773
31	30.29	30.29	42.3	18	sp|P01011|AACT_HUMAN	Alpha-1-antichymotrypsin OS=Homo sapiens GN=SERPINA3 PE=1 SV=2	HUMAN	0.9677
32	29.4	29.4	57.1	21	sp|P02649|APOE_HUMAN	Apolipoprotein E OS=Homo sapiens GN=APOE PE=1 SV=1	HUMAN	0.9373
33	26.45	26.45	8.9	22	sp|P02671|FIBA_HUMAN	Fibrinogen alpha chain OS=Homo sapiens GN=FGA PE=1 SV=2	HUMAN	0.8652
34	22.31	22.31	25.3	12	sp|P04196|HRG_HUMAN	Histidine-rich glycoprotein OS=Homo sapiens GN=HRG PE=1 SV=1	HUMAN	0.8454
35	22.28	22.35	30.2	11	sp|P06396|GELS_HUMAN	Gelsolin OS=Homo sapiens GN=GSN PE=1 SV=1	HUMAN	1.0654
36	21.12	21.14	27.6	11	sp|P04003|C4BPA_HUMAN	C4b-binding protein alpha chain OS=Homo sapiens GN=C4BPA PE=1 SV=2	HUMAN	1.0872
37	21.05	21.05	68.6	15	sp|P01842|LAC_HUMAN	Ig lambda chain C regions OS=Homo sapiens GN=IGLC1 PE=1 SV=1	HUMAN	0.7287
38	20.58	20.58	14.8	9	sp|P01031|CO5_HUMAN	Complement C5 OS=Homo sapiens GN=C5 PE=1 SV=4	HUMAN	0.8734
39	19.15	19.15	33.2	13	sp|P02760|AMBP_HUMAN	Protein AMBP OS=Homo sapiens GN=AMBP PE=1 SV=1	HUMAN	0.948
40	18.96	19.06	23.7	9	sp|P43652|AFAM_HUMAN	Afamin OS=Homo sapiens GN=AFM PE=1 SV=1	HUMAN	0.9339
41	18.41	18.41	100	11	sp|P01834|IGKC_HUMAN	Ig kappa chain C region OS=Homo sapiens GN=IGKC PE=1 SV=1	HUMAN	0.6723
42	18.13	18.13	23.6	9	sp|P05155|IC1_HUMAN	Plasma protease C1 inhibitor OS=Homo sapiens GN=SERPING1 PE=1 SV=2	HUMAN	0.7946
43	17.1	17.1	29.8	9	sp|P35858|ALS_HUMAN	Insulin-like growth factor-binding protein complex acid labile chain OS=Homo sapiens GN=IGFALS PE=1 SV=1	HUMAN	0.8655
44	15.4	15.4	40.4	8	sp|P32119|PRDX2_HUMAN	Peroxiredoxin-2 OS=Homo sapiens GN=PRDX2 PE=1 SV=5	HUMAN	1.2505
45	15.16	15.16	19	7	sp|P05546|HEP2_HUMAN	Heparin cofactor 2 OS=Homo sapiens GN=SERPIND1 PE=1 SV=3	HUMAN	0.6823
46	14.21	14.23	55.4	7	sp|P35542|SAA4_HUMAN	Serum amyloid A-4 protein OS=Homo sapiens GN=SAA4 PE=1 SV=1	HUMAN	1.0021
47	14.12	14.17	22.1	7	sp|P05156|CFAI_HUMAN	Complement factor I OS=Homo sapiens GN=CFI PE=1 SV=1	HUMAN	0.8276
48	13.63	13.63	28.7	8	sp|P08697|A2AP_HUMAN	Alpha-2-antiplasmin OS=Homo sapiens GN=SERPINF2 PE=1 SV=3	HUMAN	0.8706
49	13.62	13.92	27.3	6	sp|P02768|ALBU_HUMAN	Serum albumin OS=Homo sapiens GN=ALB PE=1 SV=2	HUMAN	2.0389
50	11.71	11.71	21.3	5	sp|P07225|PROS_HUMAN	Vitamin K-dependent protein S OS=Homo sapiens GN=PROS1 PE=1 SV=1	HUMAN	0.7728
51	11.7	11.7	60.4	6	sp|P02655|APOC2_HUMAN	Apolipoprotein C-II OS=Homo sapiens GN=APOC2 PE=1 SV=1	HUMAN	0.6648
52	11.29	11.29	31.3	5	sp|P36955|PEDF_HUMAN	Pigment epithelium-derived factor OS=Homo sapiens GN=SERPINF1 PE=1 SV=3	HUMAN	0.9614
53	11.12	11.12	18.2	5	sp|P03952|KLKB1_HUMAN	Plasma kallikrein OS=Homo sapiens GN=KLKB1 PE=1 SV=1	HUMAN	0.9353
54	11.05	11.05	31.3	15	sp|P02749|APOH_HUMAN	Beta-2-glycoprotein 1 OS=Homo sapiens GN=APOH PE=1 SV=3	HUMAN	1.2988
55	10.99	10.99	25.3	5	sp|P63261|ACTG_HUMAN	Actin, cytoplasmic 2 OS=Homo sapiens GN=ACTG1 PE=1 SV=1	HUMAN	1.5776
56	10.34	10.74	76.2	6	sp|P02766|TTHY_HUMAN	Transthyretin OS=Homo sapiens GN=TTR PE=1 SV=1	HUMAN	0.8957
57	10.27	10.27	26.6	5	sp|O95445|APOM_HUMAN	Apolipoprotein M OS=Homo sapiens GN=APOM PE=1 SV=2	HUMAN	0.9632
58	10.17	10.17	25.1	5	sp|O75636|FCN3_HUMAN	Ficolin-3 OS=Homo sapiens GN=FCN3 PE=1 SV=2	HUMAN	1.0047
59	10.04	10.04	27	7	sp|P02652|APOA2_HUMAN	Apolipoprotein A-II OS=Homo sapiens GN=APOA2 PE=1 SV=1	HUMAN	0.4768
60	10	10.01	9.5	5	sp|P23142|FBLN1_HUMAN	Fibulin-1 OS=Homo sapiens GN=FBLN1 PE=1 SV=4	HUMAN	1.05
61	10	10	13	5	sp|P01019|ANGT_HUMAN	Angiotensinogen OS=Homo sapiens GN=AGT PE=1 SV=1	HUMAN	0.6054
62	10	10	39.1	5	sp|P07360|CO8G_HUMAN	Complement component C8 gamma chain OS=Homo sapiens GN=C8G PE=1 SV=3	HUMAN	0.9795
63	10	10	33.3	5	sp|P00915|CAH1_HUMAN	Carbonic anhydrase 1 OS=Homo sapiens GN=CA1 PE=1 SV=2	HUMAN	0.9658
64	8.93	8.94	14.5	4	sp|P02748|CO9_HUMAN	Complement component C9 OS=Homo sapiens GN=C9 PE=1 SV=2	HUMAN	1.0387
65	8.49	34.14	89.1	35	sp|P02042|HBD_HUMAN	Hemoglobin subunit delta OS=Homo sapiens GN=HBD PE=1 SV=2	HUMAN	1.2447
66	8.41	8.41	23.9	4	sp|P29622|KAIN_HUMAN	Kallistatin OS=Homo sapiens GN=SERPINA4 PE=1 SV=3	HUMAN	0.7459
67	8.02	8.02	9	4	sp|P13671|CO6_HUMAN	Complement component C6 OS=Homo sapiens GN=C6 PE=1 SV=3	HUMAN	1.0044
68	8.01	8.01	18.9	4	sp|Q96PD5|PGRP2_HUMAN	N-acetylmuramoyl-L-alanine amidase OS=Homo sapiens GN=PGLYRP2 PE=1 SV=1	HUMAN	0.9319
69	8	8.04	14.4	4	sp|P07358|CO8B_HUMAN	Complement component C8 beta chain OS=Homo sapiens GN=C8B PE=1 SV=3	HUMAN	0.9519
70	8	8	36.4	16	sp|P02656|APOC3_HUMAN	Apolipoprotein C-III OS=Homo sapiens GN=APOC3 PE=1 SV=1	HUMAN	1.387
71	7.75	7.75	19	5	sp|P07357|CO8A_HUMAN	Complement component C8 alpha chain OS=Homo sapiens GN=C8A PE=1 SV=2	HUMAN	0.9023
72	7.71	7.71	13.6	4	sp|P06681|CO2_HUMAN	Complement C2 OS=Homo sapiens GN=C2 PE=1 SV=2	HUMAN	1.2964
73	7.7	7.7	32.1	4	sp|P01591|IGJ_HUMAN	Immunoglobulin J chain OS=Homo sapiens GN=IGJ PE=1 SV=3	HUMAN	0.9422
74	7.56	7.56	9.2	3	sp|P02751|FINC_HUMAN	Fibronectin OS=Homo sapiens GN=FN1 PE=1 SV=3	HUMAN	0.7611
75	6.92	6.92	16.1	3	sp|O43866|CD5L_HUMAN	CD5 antigen-like OS=Homo sapiens GN=CD5L PE=1 SV=1	HUMAN	1.0626
76	6.86	6.88	14.3	3	sp|P00748|FA12_HUMAN	Coagulation factor XII OS=Homo sapiens GN=F12 PE=1 SV=2	HUMAN	1.2034
77	6.01	6.05	10.1	3	sp|P10643|CO7_HUMAN	Complement component C7 OS=Homo sapiens GN=C7 PE=1 SV=2	HUMAN	1.2025
78	6.01	6.01	14.9	3	sp|P02753|RET4_HUMAN	Retinol-binding protein 4 OS=Homo sapiens GN=RBP4 PE=1 SV=3	HUMAN	1.0451
79	5.94	5.94	35.3	2	sp|P01781|HV320_HUMAN	Ig heavy chain V-III region GAL OS=Homo sapiens PE=1 SV=1	HUMAN	0.7626
80	5.53	5.53	11.2	3	sp|P01880|IGHD_HUMAN	Ig delta chain C region OS=Homo sapiens GN=IGHD PE=1 SV=2	HUMAN	0.9174
81	5.52	5.52	31.1	3	sp|P51884|LUM_HUMAN	Lumican OS=Homo sapiens GN=LUM PE=1 SV=2	HUMAN	0.8205
82	4.06	4.06	28.6	5	sp|P01777|HV316_HUMAN	Ig heavy chain V-III region TEI OS=Homo sapiens PE=1 SV=1	HUMAN	0.6608
83	4.05	4.05	14.4	2	sp|Q08380|LG3BP_HUMAN	Galectin-3-binding protein OS=Homo sapiens GN=LGALS3BP PE=1 SV=1	HUMAN	0.8778
84	4	4.03	9.9	2	sp|P05154|IPSP_HUMAN	Plasma serine protease inhibitor OS=Homo sapiens GN=SERPINA5 PE=1 SV=2	HUMAN	0.8682
85	4	4.03	5.8	2	sp|P05543|THBG_HUMAN	Thyroxine-binding globulin OS=Homo sapiens GN=SERPINA7 PE=1 SV=2	HUMAN	0.7517
86	4	4	8.2	2	sp|P43251|BTD_HUMAN	Biotinidase OS=Homo sapiens GN=BTD PE=1 SV=1	HUMAN	1.0376
87	4	4	16.3	2	sp|O14791|APOL1_HUMAN	Apolipoprotein L1 OS=Homo sapiens GN=APOL1 PE=1 SV=5	HUMAN	0.8397
88	4	4	7.9	2	sp|P22792|CPN2_HUMAN	Carboxypeptidase N subunit 2 OS=Homo sapiens GN=CPN2 PE=1 SV=2	HUMAN	1.0332
89	4	4	13.3	2	sp|P02750|A2GL_HUMAN	Leucine-rich alpha-2-glycoprotein OS=Homo sapiens GN=LRG1 PE=1 SV=2	HUMAN	0.7142
90	4	4	29	3	sp|P01621|KV303_HUMAN	Ig kappa chain V-III region NG9 (Fragment) OS=Homo sapiens PE=1 SV=1	HUMAN	0.7925
91	4	4	6.4	2	sp|Q96IY4|CBPB2_HUMAN	Carboxypeptidase B2 OS=Homo sapiens GN=CPB2 PE=1 SV=1	HUMAN	1.1481
92	4	4	17.8	2	sp|P01717|LV403_HUMAN	Ig lambda chain V-IV region Hil OS=Homo sapiens PE=1 SV=1	HUMAN	0.8719
93	3.96	4.11	9.3	2	sp|P00740|FA9_HUMAN	Coagulation factor IX OS=Homo sapiens GN=F9 PE=1 SV=2	HUMAN	0.7383
94	3.7	3.7	11	2	sp|P02763|A1AG1_HUMAN	Alpha-1-acid glycoprotein 1 OS=Homo sapiens GN=ORM1 PE=1 SV=1	HUMAN	0.605
95	2.67	2.67	7.6	1	sp|Q06033|ITIH3_HUMAN	Inter-alpha-trypsin inhibitor heavy chain H3 OS=Homo sapiens GN=ITIH3 PE=1 SV=2	HUMAN	1.0599
96	2.45	2.45	4.4	1	sp|P80108|PHLD_HUMAN	Phosphatidylinositol-glycan-specific phospholipase D OS=Homo sapiens GN=GPLD1 PE=1 SV=3	HUMAN	0.9414
97	2.33	2.37	6.4	1	sp|Q13753|LAMC2_HUMAN	Laminin subunit gamma-2 OS=Homo sapiens GN=LAMC2 PE=1 SV=2	HUMAN	0.7849
98	2.32	2.32	22.2	2	sp|P23083|HV103_HUMAN	Ig heavy chain V-I region V35 OS=Homo sapiens PE=1 SV=1	HUMAN	0.5595
99	2.12	41.06	58.9	29	sp|P00739|HPTR_HUMAN	Haptoglobin-related protein OS=Homo sapiens GN=HPR PE=2 SV=1	HUMAN	1.5693
100	2.06	2.06	4.1	1	sp|Q6ZW49|PAXI1_HUMAN	PAX-interacting protein 1 OS=Homo sapiens GN=PAXIP1 PE=1 SV=1	HUMAN	1.326
101	2.05	2.51	4.9	1	sp|O94833|BPAEA_HUMAN	Bullous pemphigoid antigen 1, isoforms 6/9/10 OS=Homo sapiens GN=DST PE=1 SV=3	HUMAN	0.9703
102	2.03	2.03	18.2	1	sp|P17936|IBP3_HUMAN	Insulin-like growth factor-binding protein 3 OS=Homo sapiens GN=IGFBP3 PE=1 SV=2	HUMAN	0.8847
103	2.01	4.51	8.8	2	sp|P08582|TRFM_HUMAN	Melanotransferrin OS=Homo sapiens GN=MFI2 PE=1 SV=1	HUMAN
104	2.01	2.87	2.2	1	RRRRRsp|Q99698|LYST_HUMAN	REVERSED Lysosomal-trafficking regulator OS=Homo sapiens GN=LYST PE=1 SV=3	HUMAN	1.1173
105	2.01	2.01	13.1	1	sp|Q01449|MLRA_HUMAN	Myosin regulatory light chain 2, atrial isoform OS=Homo sapiens GN=MYL7 PE=2 SV=1	HUMAN	1.0651
106	2	118.87	45.4	64	sp|P0C0L4|CO4A_HUMAN	Complement C4-A OS=Homo sapiens GN=C4A PE=1 SV=1	HUMAN
107	2	31.59	23.9	17	sp|P20742|PZP_HUMAN	Pregnancy zone protein OS=Homo sapiens GN=PZP PE=1 SV=3	HUMAN
108	2	9.65	32.7	12	sp|P69892|HBG2_HUMAN	Hemoglobin subunit gamma-2 OS=Homo sapiens GN=HBG2 PE=1 SV=2	HUMAN	0.7449
109	2	3.7	7.6	2	sp|Q92954|PRG4_HUMAN	Proteoglycan 4 OS=Homo sapiens GN=PRG4 PE=1 SV=2	HUMAN	0.993
110	2	2.9	6.5	1	sp|Q7Z7A1|CP110_HUMAN	Centriolin OS=Homo sapiens GN=CEP110 PE=1 SV=2	HUMAN
111	2	2.04	12.9	1	sp|P06732|KCRM_HUMAN	Creatine kinase M-type OS=Homo sapiens GN=CKM PE=1 SV=2	HUMAN	1.053
112	2	2.01	10.5	1	RRRRRsp|Q16478|GRIK5_HUMAN	REVERSED Glutamate receptor, ionotropic kainate 5 OS=Homo sapiens GN=GRIK5 PE=2 SV=2	HUMAN	0.5916
113	2	2.01	6.3	1	sp|Q04756|HGFA_HUMAN	Hepatocyte growth factor activator OS=Homo sapiens GN=HGFAC PE=1 SV=1	HUMAN	0.9471
114	2	2	7.4	1	sp|P08185|CBG_HUMAN	Corticosteroid-binding globulin OS=Homo sapiens GN=SERPINA6 PE=1 SV=1	HUMAN	1.0277
115	2	2	5	1	sp|Q16610|ECM1_HUMAN	Extracellular matrix protein 1 OS=Homo sapiens GN=ECM1 PE=1 SV=2	HUMAN	0.6744
116	2	2	4.5	1	sp|Q96KN2|CNDP1_HUMAN	Beta-Ala-His dipeptidase OS=Homo sapiens GN=CNDP1 PE=1 SV=3	HUMAN	0.527
117	2	2	4.1	1	sp|P15169|CBPN_HUMAN	Carboxypeptidase N catalytic chain OS=Homo sapiens GN=CPN1 PE=1 SV=1	HUMAN	0.8929
118	2	2	7.7	1	sp|P08571|CD14_HUMAN	Monocyte differentiation antigen CD14 OS=Homo sapiens GN=CD14 PE=1 SV=2	HUMAN	0.8755
119	2	2	23.5	1	sp|P04433|KV309_HUMAN	Ig kappa chain V-III region VG (Fragment) OS=Homo sapiens PE=4 SV=1	HUMAN	0.6111
120	2	2	20.3	1	sp|P02775|CXCL7_HUMAN	Platelet basic protein OS=Homo sapiens GN=PPBP PE=1 SV=3	HUMAN	0.8431
121	2	2	2.3	1	sp|Q14520|HABP2_HUMAN	Hyaluronan-binding protein 2 OS=Homo sapiens GN=HABP2 PE=1 SV=1	HUMAN	0.6388
122	2	2	16.2	1	sp|P80748|LV302_HUMAN	Ig lambda chain V-III region LOI OS=Homo sapiens PE=1 SV=1	HUMAN	0.798
123	2	2	8.1	1	sp|P61626|LYSC_HUMAN	Lysozyme C OS=Homo sapiens GN=LYZ PE=1 SV=1	HUMAN	0.8774
124	2	2	4.5	1	sp|P27169|PON1_HUMAN	Serum paraoxonase/arylesterase 1 OS=Homo sapiens GN=PON1 PE=1 SV=2	HUMAN	0.5219
125	2	2	6	1	sp|P02746|C1QB_HUMAN	Complement C1q subcomponent subunit B OS=Homo sapiens GN=C1QB PE=1 SV=2	HUMAN	0.8448
126	1.7	1.7	2.5	1	sp|P04180|LCAT_HUMAN	Phosphatidylcholine-sterol acyltransferase OS=Homo sapiens GN=LCAT PE=1 SV=1	HUMAN	0.671
127	1.52	1.67	5.5	1	RRRRRsp|Q9H6X2|ANTR1_HUMAN	REVERSED Anthrax toxin receptor 1 OS=Homo sapiens GN=ANTXR1 PE=1 SV=2	HUMAN
128	1.4	2.04	2.1	1	sp|Q8N4M1|CTL3_HUMAN	Choline transporter-like protein 3 OS=Homo sapiens GN=SLC44A3 PE=2 SV=3	HUMAN

## Sheet: N2
								114 label: T1 serum
								116 label: T2 serum
Healthy volunteer N2
N	Unused	Total	% Cov	Peptides(95%)	Accession #	Name	Species	116:114
1	156.94	156.94	73.2	121	sp|P02787|TRFE_HUMAN	Serotransferrin OS=Homo sapiens GN=TF PE=1 SV=2	HUMAN	0.498
2	138.05	138.05	55.1	98	sp|P01023|A2MG_HUMAN	Alpha-2-macroglobulin OS=Homo sapiens GN=A2M PE=1 SV=1	HUMAN	0.5939
3	130.88	130.88	53	86	sp|P01024|CO3_HUMAN	Complement C3 OS=Homo sapiens GN=C3 PE=1 SV=2	HUMAN	0.708
4	121.13	121.13	91	133	sp|P02647|APOA1_HUMAN	Apolipoprotein A-I OS=Homo sapiens GN=APOA1 PE=1 SV=1	HUMAN	1.2113
5	104.53	104.53	79.6	105	sp|P00738|HPT_HUMAN	Haptoglobin OS=Homo sapiens GN=HP PE=1 SV=1	HUMAN	0.7503
6	85.4	85.41	18.1	54	sp|P04114|APOB_HUMAN	Apolipoprotein B-100 OS=Homo sapiens GN=APOB PE=1 SV=1	HUMAN	1.2171
7	79.02	79.02	73.9	72	sp|P01009|A1AT_HUMAN	Alpha-1-antitrypsin OS=Homo sapiens GN=SERPINA1 PE=1 SV=3	HUMAN	0.6297
8	70.32	70.32	31.8	42	sp|P0C0L5|CO4B_HUMAN	Complement C4-B OS=Homo sapiens GN=C4B PE=1 SV=1	HUMAN	0.9968
9	59.78	59.79	40.9	38	sp|P00450|CERU_HUMAN	Ceruloplasmin OS=Homo sapiens GN=CP PE=1 SV=1	HUMAN	0.8022
10	59.59	59.59	51.5	36	sp|P02790|HEMO_HUMAN	Hemopexin OS=Homo sapiens GN=HPX PE=1 SV=2	HUMAN	0.7277
11	53.34	53.34	88.4	83	sp|P68871|HBB_HUMAN	Hemoglobin subunit beta OS=Homo sapiens GN=HBB PE=1 SV=2	HUMAN	0.1913
12	51.38	51.38	63.6	26	sp|P06727|APOA4_HUMAN	Apolipoprotein A-IV OS=Homo sapiens GN=APOA4 PE=1 SV=3	HUMAN	0.791
13	48.08	48.53	34.3	29	sp|P08603|CFAH_HUMAN	Complement factor H OS=Homo sapiens GN=CFH PE=1 SV=4	HUMAN	0.6657
14	47.94	47.94	52.4	32	sp|P01871|IGHM_HUMAN	Ig mu chain C region OS=Homo sapiens GN=IGHM PE=1 SV=3	HUMAN	0.6363
15	46.7	46.7	48.8	28	sp|P02768|ALBU_HUMAN	Serum albumin OS=Homo sapiens GN=ALB PE=1 SV=2	HUMAN	3.2254
16	43.74	43.74	47.1	29	sp|P00734|THRB_HUMAN	Prothrombin OS=Homo sapiens GN=F2 PE=1 SV=2	HUMAN	0.703
17	42.77	42.77	59.8	40	sp|P01876|IGHA1_HUMAN	Ig alpha-1 chain C region OS=Homo sapiens GN=IGHA1 PE=1 SV=2	HUMAN	0.5223
18	39.03	39.03	52.2	24	sp|P02763|A1AG1_HUMAN	Alpha-1-acid glycoprotein 1 OS=Homo sapiens GN=ORM1 PE=1 SV=1	HUMAN	0.6533
19	38.8	38.8	38.4	22	sp|P00751|CFAB_HUMAN	Complement factor B OS=Homo sapiens GN=CFB PE=1 SV=2	HUMAN	0.9188
20	37.97	37.97	51.1	22	sp|P04217|A1BG_HUMAN	Alpha-1B-glycoprotein OS=Homo sapiens GN=A1BG PE=1 SV=3	HUMAN	0.8809
21	37.52	37.52	69.7	61	sp|P69905|HBA_HUMAN	Hemoglobin subunit alpha OS=Homo sapiens GN=HBA1 PE=1 SV=2	HUMAN	0.1698
22	36.73	37.17	58.9	20	cont|000137	spt|P00760| Cationic trypsin precursor (EC 3.4.21.4) (Beta-trypsin) (Fragment) [Bos taurus (contaminant)]	Bos taurus (contaminant)	0.6124
23	36.63	36.63	70	29	sp|P02649|APOE_HUMAN	Apolipoprotein E OS=Homo sapiens GN=APOE PE=1 SV=1	HUMAN	1.1946
24	32.28	32.42	45.6	22	sp|P02774|VTDB_HUMAN	Vitamin D-binding protein OS=Homo sapiens GN=GC PE=1 SV=1	HUMAN	0.5248
25	30.46	30.53	32	18	sp|P01042|KNG1_HUMAN	Kininogen-1 OS=Homo sapiens GN=KNG1 PE=1 SV=2	HUMAN	0.6743
26	30.15	30.15	26.4	18	sp|P19823|ITIH2_HUMAN	Inter-alpha-trypsin inhibitor heavy chain H2 OS=Homo sapiens GN=ITIH2 PE=1 SV=1	HUMAN	0.7732
27	29.8	29.8	38.5	23	sp|P04004|VTNC_HUMAN	Vitronectin OS=Homo sapiens GN=VTN PE=1 SV=1	HUMAN	0.7563
28	26.83	26.84	44.4	19	sp|P02749|APOH_HUMAN	Beta-2-glycoprotein 1 OS=Homo sapiens GN=APOH PE=1 SV=3	HUMAN	0.6778
29	26.04	26.06	41.7	12	sp|P10909|CLUS_HUMAN	Clusterin OS=Homo sapiens GN=CLU PE=1 SV=1	HUMAN	1.1513
30	23.92	23.92	34.9	17	sp|P02765|FETUA_HUMAN	Alpha-2-HS-glycoprotein OS=Homo sapiens GN=AHSG PE=1 SV=1	HUMAN	0.7383
31	22.89	22.89	24.8	18	sp|P01011|AACT_HUMAN	Alpha-1-antichymotrypsin OS=Homo sapiens GN=SERPINA3 PE=1 SV=2	HUMAN	0.6674
32	22.13	22.13	59.3	12	sp|P25311|ZA2G_HUMAN	Zinc-alpha-2-glycoprotein OS=Homo sapiens GN=AZGP1 PE=1 SV=1	HUMAN	0.5087
33	20.31	20.31	59.2	10	sp|P35542|SAA4_HUMAN	Serum amyloid A-4 protein OS=Homo sapiens GN=SAA4 PE=1 SV=1	HUMAN	1.082
34	20.13	20.13	35.1	13	sp|P04196|HRG_HUMAN	Histidine-rich glycoprotein OS=Homo sapiens GN=HRG PE=1 SV=1	HUMAN	0.6762
35	20.05	20.05	30.4	11	sp|P01008|ANT3_HUMAN	Antithrombin-III OS=Homo sapiens GN=SERPINC1 PE=1 SV=1	HUMAN	0.8686
36	20	20.03	24.4	12	sp|P19827|ITIH1_HUMAN	Inter-alpha-trypsin inhibitor heavy chain H1 OS=Homo sapiens GN=ITIH1 PE=1 SV=3	HUMAN	0.9402
37	19.9	19.91	52	18	sp|P02652|APOA2_HUMAN	Apolipoprotein A-II OS=Homo sapiens GN=APOA2 PE=1 SV=1	HUMAN	1.3129
38	18.91	18.92	25.1	10	sp|P00747|PLMN_HUMAN	Plasminogen OS=Homo sapiens GN=PLG PE=1 SV=2	HUMAN	0.9176
39	15.54	15.54	14.7	8	sp|Q14624|ITIH4_HUMAN	Inter-alpha-trypsin inhibitor heavy chain H4 OS=Homo sapiens GN=ITIH4 PE=1 SV=3	HUMAN	0.8333
40	15.4	15.4	75.2	11	sp|P01842|LAC_HUMAN	Ig lambda chain C regions OS=Homo sapiens GN=IGLC1 PE=1 SV=1	HUMAN	0.6108
41	14.7	14.7	23.6	7	sp|P05155|IC1_HUMAN	Plasma protease C1 inhibitor OS=Homo sapiens GN=SERPING1 PE=1 SV=2	HUMAN	1.0967
42	14.23	14.23	78.2	11	sp|P02655|APOC2_HUMAN	Apolipoprotein C-II OS=Homo sapiens GN=APOC2 PE=1 SV=1	HUMAN	1.7799
43	14	14	33.3	7	sp|P32119|PRDX2_HUMAN	Peroxiredoxin-2 OS=Homo sapiens GN=PRDX2 PE=1 SV=5	HUMAN	0.2261
44	13.68	13.77	84	16	sp|P01834|IGKC_HUMAN	Ig kappa chain C region OS=Homo sapiens GN=IGKC PE=1 SV=1	HUMAN	0.4369
45	12.15	12.15	37.6	12	sp|P05090|APOD_HUMAN	Apolipoprotein D OS=Homo sapiens GN=APOD PE=1 SV=1	HUMAN	0.9943
46	12.07	12.07	56.5	6	sp|P02766|TTHY_HUMAN	Transthyretin OS=Homo sapiens GN=TTR PE=1 SV=1	HUMAN	0.6565
47	12.04	12.04	47.5	10	sp|P00915|CAH1_HUMAN	Carbonic anhydrase 1 OS=Homo sapiens GN=CA1 PE=1 SV=2	HUMAN	0.2692
48	12	12.02	6	11	sp|P02671|FIBA_HUMAN	Fibrinogen alpha chain OS=Homo sapiens GN=FGA PE=1 SV=2	HUMAN	1.3435
49	11.52	11.54	19.3	6	sp|P06396|GELS_HUMAN	Gelsolin OS=Homo sapiens GN=GSN PE=1 SV=1	HUMAN	0.9057
50	10.25	10.25	16.9	5	sp|P29622|KAIN_HUMAN	Kallistatin OS=Homo sapiens GN=SERPINA4 PE=1 SV=3	HUMAN	1.2043
51	10.08	10.08	26.4	6	sp|Q96PD5|PGRP2_HUMAN	N-acetylmuramoyl-L-alanine amidase OS=Homo sapiens GN=PGLYRP2 PE=1 SV=1	HUMAN	0.5482
52	10	41.38	87.8	43	sp|P02042|HBD_HUMAN	Hemoglobin subunit delta OS=Homo sapiens GN=HBD PE=1 SV=2	HUMAN	0.3354
53	10	10.01	12	5	sp|P07225|PROS_HUMAN	Vitamin K-dependent protein S OS=Homo sapiens GN=PROS1 PE=1 SV=1	HUMAN	0.8821
54	10	10	13.2	7	sp|P05546|HEP2_HUMAN	Heparin cofactor 2 OS=Homo sapiens GN=SERPIND1 PE=1 SV=3	HUMAN	0.8727
55	10	10	15.9	6	sp|P01019|ANGT_HUMAN	Angiotensinogen OS=Homo sapiens GN=AGT PE=1 SV=1	HUMAN	1.1528
56	10	10	36.4	20	sp|P02656|APOC3_HUMAN	Apolipoprotein C-III OS=Homo sapiens GN=APOC3 PE=1 SV=1	HUMAN	1.9178
57	9.65	9.65	31.3	4	sp|P02753|RET4_HUMAN	Retinol-binding protein 4 OS=Homo sapiens GN=RBP4 PE=1 SV=3	HUMAN	0.5277
58	8	8.02	3.6	4	sp|P01031|CO5_HUMAN	Complement C5 OS=Homo sapiens GN=C5 PE=1 SV=4	HUMAN	0.9493
59	8	8	16.9	8	sp|P27169|PON1_HUMAN	Serum paraoxonase/arylesterase 1 OS=Homo sapiens GN=PON1 PE=1 SV=2	HUMAN	0.9836
60	7.35	7.35	17.4	4	sp|P35858|ALS_HUMAN	Insulin-like growth factor-binding protein complex acid labile chain OS=Homo sapiens GN=IGFALS PE=1 SV=1	HUMAN	0.8746
61	6.75	6.75	11.4	3	sp|P04003|C4BPA_HUMAN	C4b-binding protein alpha chain OS=Homo sapiens GN=C4BPA PE=1 SV=2	HUMAN	0.3986
62	6	6	16.6	3	sp|P07357|CO8A_HUMAN	Complement component C8 alpha chain OS=Homo sapiens GN=C8A PE=1 SV=2	HUMAN	0.6185
63	6	6	23.4	4	sp|P80748|LV302_HUMAN	Ig lambda chain V-III region LOI OS=Homo sapiens PE=1 SV=1	HUMAN	1.2662
64	5.52	5.52	8.5	4	sp|O14791|APOL1_HUMAN	Apolipoprotein L1 OS=Homo sapiens GN=APOL1 PE=1 SV=5	HUMAN	1.1034
65	5.31	5.31	13.6	3	sp|P02760|AMBP_HUMAN	Protein AMBP OS=Homo sapiens GN=AMBP PE=1 SV=1	HUMAN	0.5421
66	4.77	4.77	13	3	sp|P08697|A2AP_HUMAN	Alpha-2-antiplasmin OS=Homo sapiens GN=SERPINF2 PE=1 SV=3	HUMAN	0.9557
67	4.39	4.39	12.8	2	sp|O95445|APOM_HUMAN	Apolipoprotein M OS=Homo sapiens GN=APOM PE=1 SV=2	HUMAN	0.7972
68	4.11	4.11	15.9	2	sp|P02750|A2GL_HUMAN	Leucine-rich alpha-2-glycoprotein OS=Homo sapiens GN=LRG1 PE=1 SV=2	HUMAN	1.2996
69	4.01	4.01	12.1	2	sp|P06681|CO2_HUMAN	Complement C2 OS=Homo sapiens GN=C2 PE=1 SV=2	HUMAN	0.8226
70	4	4.04	17.2	2	sp|P51884|LUM_HUMAN	Lumican OS=Homo sapiens GN=LUM PE=1 SV=2	HUMAN	1.0694
71	4	4.01	13.8	4	sp|P00748|FA12_HUMAN	Coagulation factor XII OS=Homo sapiens GN=F12 PE=1 SV=2	HUMAN	0.7411
72	4	4	8.5	2	sp|P43652|AFAM_HUMAN	Afamin OS=Homo sapiens GN=AFM PE=1 SV=1	HUMAN	0.5697
73	4	4	17.3	2	sp|Q562R1|ACTBL_HUMAN	Beta-actin-like protein 2 OS=Homo sapiens GN=ACTBL2 PE=1 SV=2	HUMAN	0.9848
74	4	4	9.2	2	sp|P03952|KLKB1_HUMAN	Plasma kallikrein OS=Homo sapiens GN=KLKB1 PE=1 SV=1	HUMAN	0.6908
75	4	4	53.3	2	sp|P02735|SAA_HUMAN	Serum amyloid A protein OS=Homo sapiens GN=SAA1 PE=1 SV=2	HUMAN	2.3
76	4	4	26	4	sp|P01621|KV303_HUMAN	Ig kappa chain V-III region NG9 (Fragment) OS=Homo sapiens PE=1 SV=1	HUMAN	0.9464
77	4	4	20.5	2	sp|P23083|HV103_HUMAN	Ig heavy chain V-I region V35 OS=Homo sapiens PE=1 SV=1	HUMAN	0.7168
78	4	4	9	2	sp|P02747|C1QC_HUMAN	Complement C1q subcomponent subunit C OS=Homo sapiens GN=C1QC PE=1 SV=3	HUMAN	1.3554
79	4	4	17.8	6	sp|P01717|LV403_HUMAN	Ig lambda chain V-IV region Hil OS=Homo sapiens PE=1 SV=1	HUMAN	1.2467
80	4	4	6.4	2	sp|O75636|FCN3_HUMAN	Ficolin-3 OS=Homo sapiens GN=FCN3 PE=1 SV=2	HUMAN	0.7201
81	3.55	23.37	46.8	12	sp|P19652|A1AG2_HUMAN	Alpha-1-acid glycoprotein 2 OS=Homo sapiens GN=ORM2 PE=1 SV=2	HUMAN	0.7506
82	3.3	53.3	70.1	42	sp|P00739|HPTR_HUMAN	Haptoglobin-related protein OS=Homo sapiens GN=HPR PE=2 SV=1	HUMAN	0.3524
83	3.3	34.77	47.1	31	sp|P01877|IGHA2_HUMAN	Ig alpha-2 chain C region OS=Homo sapiens GN=IGHA2 PE=1 SV=3	HUMAN	0.3153
84	3.3	3.3	16.8	3	sp|P01591|IGJ_HUMAN	Immunoglobulin J chain OS=Homo sapiens GN=IGJ PE=1 SV=3	HUMAN	0.6349
85	2.42	2.42	22.7	1	sp|P01774|HV313_HUMAN	Ig heavy chain V-III region POM OS=Homo sapiens PE=1 SV=1	HUMAN
86	2.29	2.29	8.7	1	sp|P13671|CO6_HUMAN	Complement component C6 OS=Homo sapiens GN=C6 PE=1 SV=3	HUMAN	0.6981
87	2.15	6.15	21.5	3	sp|Q03591|FHR1_HUMAN	Complement factor H-related protein 1 OS=Homo sapiens GN=CFHR1 PE=1 SV=2	HUMAN	0.8505
88	2.12	2.12	9.2	1	sp|Q96IY4|CBPB2_HUMAN	Carboxypeptidase B2 OS=Homo sapiens GN=CPB2 PE=1 SV=1	HUMAN	1.1932
89	2.11	2.11	10.6	1	sp|P22352|GPX3_HUMAN	Glutathione peroxidase 3 OS=Homo sapiens GN=GPX3 PE=1 SV=2	HUMAN	0.6208
90	2.04	2.04	6.2	1	sp|P08185|CBG_HUMAN	Corticosteroid-binding globulin OS=Homo sapiens GN=SERPINA6 PE=1 SV=1	HUMAN	0.758
91	2.02	2.04	10.9	1	sp|P35527|K1C9_HUMAN	Keratin, type I cytoskeletal 9 OS=Homo sapiens GN=KRT9 PE=1 SV=2	HUMAN	7.2721
92	2.02	2.02	21.6	2	sp|P06314|KV404_HUMAN	Ig kappa chain V-IV region B17 OS=Homo sapiens PE=2 SV=1	HUMAN	1.1567
93	2.01	11.69	22.9	6	cont|000097	gi|1351907|sp|P02769|ALBU_BOVIN Serum albumin precursor (Allergen Bos d 6) (BSA) [Bos taurus (contaminant)]	Bos taurus (contaminant)
94	2	70.32	31.4	42	sp|P0C0L4|CO4A_HUMAN	Complement C4-A OS=Homo sapiens GN=C4A PE=1 SV=1	HUMAN
95	2	2.02	7.9	1	sp|P05154|IPSP_HUMAN	Plasma serine protease inhibitor OS=Homo sapiens GN=SERPINA5 PE=1 SV=2	HUMAN
96	2	2.02	5.9	1	sp|P02748|CO9_HUMAN	Complement component C9 OS=Homo sapiens GN=C9 PE=1 SV=2	HUMAN	0.8305
97	2	2.01	11.2	1	sp|P07358|CO8B_HUMAN	Complement component C8 beta chain OS=Homo sapiens GN=C8B PE=1 SV=3	HUMAN	0.5247
98	2	2	11.2	1	sp|P04264|K2C1_HUMAN	Keratin, type II cytoskeletal 1 OS=Homo sapiens GN=KRT1 PE=1 SV=5	HUMAN	2.4238
99	2	2	14.4	1	sp|P36955|PEDF_HUMAN	Pigment epithelium-derived factor OS=Homo sapiens GN=SERPINF1 PE=1 SV=3	HUMAN	0.7672
100	2	2	7.4	1	sp|P80108|PHLD_HUMAN	Phosphatidylinositol-glycan-specific phospholipase D OS=Homo sapiens GN=GPLD1 PE=1 SV=3	HUMAN	1.4851
101	2	2	8.4	1	sp|P43251|BTD_HUMAN	Biotinidase OS=Homo sapiens GN=BTD PE=1 SV=1	HUMAN	0.8383
102	2	2	9	1	sp|Q9UK55|ZPI_HUMAN	Protein Z-dependent protease inhibitor OS=Homo sapiens GN=SERPINA10 PE=1 SV=1	HUMAN	0.7507
103	2	2	9.3	1	sp|P55058|PLTP_HUMAN	Phospholipid transfer protein OS=Homo sapiens GN=PLTP PE=1 SV=1	HUMAN	0.7947
104	2	2	4.7	1	sp|P48740|MASP1_HUMAN	Complement-activating component of Ra-reactive factor OS=Homo sapiens GN=MASP1 PE=1 SV=3	HUMAN	0.9245
105	2	2	21.8	1	sp|P05452|TETN_HUMAN	Tetranectin OS=Homo sapiens GN=CLEC3B PE=1 SV=2	HUMAN	1.0559
106	2	2	11.5	1	sp|P08571|CD14_HUMAN	Monocyte differentiation antigen CD14 OS=Homo sapiens GN=CD14 PE=1 SV=2	HUMAN	0.9335
107	2	2	16	6	sp|P01777|HV316_HUMAN	Ig heavy chain V-III region TEI OS=Homo sapiens PE=1 SV=1	HUMAN
108	2	2	16.7	1	sp|P01714|LV301_HUMAN	Ig lambda chain V-III region SH OS=Homo sapiens PE=1 SV=1	HUMAN	0.7867
109	1.7	1.88	3.7	1	sp|Q04756|HGFA_HUMAN	Hepatocyte growth factor activator OS=Homo sapiens GN=HGFAC PE=1 SV=1	HUMAN	0.8762
110	1.52	1.52	9.2	1	sp|Q96GU1|GGEE1_HUMAN	G antigen family E member 1 OS=Homo sapiens GN=PAGE5 PE=2 SV=2	HUMAN
111	1.4	1.4	8.1	1	RRRRRsp|Q9BSH4|CCD44_HUMAN	REVERSED Coiled-coil domain-containing protein 44 OS=Homo sapiens GN=CCDC44 PE=1 SV=1	HUMAN
112	1.31	1.38	3.8	1	RRRRRsp|Q12830|BPTF_HUMAN	REVERSED Nucleosome-remodeling factor subunit BPTF OS=Homo sapiens GN=BPTF PE=1 SV=3	HUMAN
113	1.3	1.3	3.7	1	sp|P22792|CPN2_HUMAN	Carboxypeptidase N subunit 2 OS=Homo sapiens GN=CPN2 PE=1 SV=2	HUMAN	0.5333
114	1.15	1.18	3.2	0	sp|Q8IZH2|XRN1_HUMAN	5'-3' exoribonuclease 1 OS=Homo sapiens GN=XRN1 PE=1 SV=1	HUMAN
115	1.15	1.15	3.2	0	sp|O95171|SCEL_HUMAN	Sciellin OS=Homo sapiens GN=SCEL PE=1 SV=2	HUMAN
116	1.14	1.15	7.4	0	sp|P04040|CATA_HUMAN	Catalase OS=Homo sapiens GN=CAT PE=1 SV=3	HUMAN	0.5076
117	1.11	2.69	4.1	1	sp|O94833|BPAEA_HUMAN	Bullous pemphigoid antigen 1, isoforms 6/9/10 OS=Homo sapiens GN=DST PE=1 SV=3	HUMAN	1.4123

## Sheet: N3
								115 label: T1 serum
								117 label: T2 serum
Healthy volunteer N3
N	Unused	Total	% Cov	Peptides(95%)	Accession #	Name	Species	117:115
1	159.21	159.21	62.9	118	sp|P01023|A2MG_HUMAN	Alpha-2-macroglobulin OS=Homo sapiens GN=A2M PE=1 SV=1	HUMAN	0.9044
2	140.7	140.7	55	90	sp|P01024|CO3_HUMAN	Complement C3 OS=Homo sapiens GN=C3 PE=1 SV=2	HUMAN	1.1531
3	129.14	129.14	65.9	105	sp|P02787|TRFE_HUMAN	Serotransferrin OS=Homo sapiens GN=TF PE=1 SV=2	HUMAN	1.1719
4	90.76	90.76	91	72	sp|P02647|APOA1_HUMAN	Apolipoprotein A-I OS=Homo sapiens GN=APOA1 PE=1 SV=1	HUMAN	0.6939
5	83.44	83.45	40.6	52	sp|P0C0L4|CO4A_HUMAN	Complement C4-A OS=Homo sapiens GN=C4A PE=1 SV=1	HUMAN	1.0365
6	70.57	70.57	76.6	68	sp|P00738|HPT_HUMAN	Haptoglobin OS=Homo sapiens GN=HP PE=1 SV=1	HUMAN	1.3083
7	60.75	60.75	44.3	38	sp|P00450|CERU_HUMAN	Ceruloplasmin OS=Homo sapiens GN=CP PE=1 SV=1	HUMAN	0.918
8	57.12	57.12	59.1	36	sp|P02768|ALBU_HUMAN	Serum albumin OS=Homo sapiens GN=ALB PE=1 SV=2	HUMAN	6.0482
9	54.63	54.63	62	51	sp|P01009|A1AT_HUMAN	Alpha-1-antitrypsin OS=Homo sapiens GN=SERPINA1 PE=1 SV=3	HUMAN	1.0187
10	54.4	54.4	12.9	27	sp|P04114|APOB_HUMAN	Apolipoprotein B-100 OS=Homo sapiens GN=APOB PE=1 SV=1	HUMAN	0.8262
11	51.96	51.96	58.2	37	sp|P01871|IGHM_HUMAN	Ig mu chain C region OS=Homo sapiens GN=IGHM PE=1 SV=3	HUMAN	0.8109
12	46.05	46.05	56.4	39	sp|P01876|IGHA1_HUMAN	Ig alpha-1 chain C region OS=Homo sapiens GN=IGHA1 PE=1 SV=2	HUMAN	0.9129
13	42.85	42.85	59.6	23	sp|P06727|APOA4_HUMAN	Apolipoprotein A-IV OS=Homo sapiens GN=APOA4 PE=1 SV=3	HUMAN	0.8031
14	36.88	36.91	22.8	20	sp|P08603|CFAH_HUMAN	Complement factor H OS=Homo sapiens GN=CFH PE=1 SV=4	HUMAN	1.2156
15	36.13	36.13	55.6	21	sp|P00734|THRB_HUMAN	Prothrombin OS=Homo sapiens GN=F2 PE=1 SV=2	HUMAN	1.0387
16	34.27	34.77	63.8	20	cont|000137	spt|P00760| Cationic trypsin precursor (EC 3.4.21.4) (Beta-trypsin) (Fragment) [Bos taurus (contaminant)]	Bos taurus (contaminant)	0.9148
17	33.79	33.79	43.1	19	sp|P02790|HEMO_HUMAN	Hemopexin OS=Homo sapiens GN=HPX PE=1 SV=2	HUMAN	0.965
18	32.91	32.91	26.2	21	sp|P19823|ITIH2_HUMAN	Inter-alpha-trypsin inhibitor heavy chain H2 OS=Homo sapiens GN=ITIH2 PE=1 SV=1	HUMAN	0.8485
19	30.3	30.32	45.4	17	sp|P02774|VTDB_HUMAN	Vitamin D-binding protein OS=Homo sapiens GN=GC PE=1 SV=1	HUMAN	1.1325
20	28.75	28.75	36.5	22	sp|P02765|FETUA_HUMAN	Alpha-2-HS-glycoprotein OS=Homo sapiens GN=AHSG PE=1 SV=1	HUMAN	0.8955
21	28.3	28.3	34.9	16	sp|P04196|HRG_HUMAN	Histidine-rich glycoprotein OS=Homo sapiens GN=HRG PE=1 SV=1	HUMAN	0.9208
22	26.82	26.82	42	16	sp|P04217|A1BG_HUMAN	Alpha-1B-glycoprotein OS=Homo sapiens GN=A1BG PE=1 SV=3	HUMAN	0.971
23	25.51	25.51	31.7	14	sp|P00751|CFAB_HUMAN	Complement factor B OS=Homo sapiens GN=CFB PE=1 SV=2	HUMAN	0.8712
24	25.03	25.04	23.1	13	sp|Q14624|ITIH4_HUMAN	Inter-alpha-trypsin inhibitor heavy chain H4 OS=Homo sapiens GN=ITIH4 PE=1 SV=3	HUMAN	0.9279
25	24.49	24.49	30.5	12	sp|P04004|VTNC_HUMAN	Vitronectin OS=Homo sapiens GN=VTN PE=1 SV=1	HUMAN	0.8773
26	23.73	23.73	73.5	33	sp|P68871|HBB_HUMAN	Hemoglobin subunit beta OS=Homo sapiens GN=HBB PE=1 SV=2	HUMAN	0.8153
27	22.49	22.49	24.8	13	sp|P01042|KNG1_HUMAN	Kininogen-1 OS=Homo sapiens GN=KNG1 PE=1 SV=2	HUMAN	0.8311
28	21.04	21.04	44.3	12	sp|P02763|A1AG1_HUMAN	Alpha-1-acid glycoprotein 1 OS=Homo sapiens GN=ORM1 PE=1 SV=1	HUMAN	1.1346
29	20	20	53.6	11	sp|P25311|ZA2G_HUMAN	Zinc-alpha-2-glycoprotein OS=Homo sapiens GN=AZGP1 PE=1 SV=1	HUMAN	1.084
30	19.56	19.56	20.6	13	sp|P01011|AACT_HUMAN	Alpha-1-antichymotrypsin OS=Homo sapiens GN=SERPINA3 PE=1 SV=2	HUMAN	0.7545
31	18.82	18.82	32.8	10	sp|P01008|ANT3_HUMAN	Antithrombin-III OS=Homo sapiens GN=SERPINC1 PE=1 SV=1	HUMAN	1.0091
32	18.29	18.29	43.9	14	sp|P05090|APOD_HUMAN	Apolipoprotein D OS=Homo sapiens GN=APOD PE=1 SV=1	HUMAN	0.9023
33	18.19	18.19	28.5	9	sp|P10909|CLUS_HUMAN	Clusterin OS=Homo sapiens GN=CLU PE=1 SV=1	HUMAN	0.7705
34	18	18	39.8	11	sp|P02649|APOE_HUMAN	Apolipoprotein E OS=Homo sapiens GN=APOE PE=1 SV=1	HUMAN	0.9338
35	17.42	17.43	84	22	sp|P01834|IGKC_HUMAN	Ig kappa chain C region OS=Homo sapiens GN=IGKC PE=1 SV=1	HUMAN	0.9834
36	16.42	16.43	23.8	8	sp|P00747|PLMN_HUMAN	Plasminogen OS=Homo sapiens GN=PLG PE=1 SV=2	HUMAN	1.0357
37	14.11	14.13	21.7	7	sp|P06396|GELS_HUMAN	Gelsolin OS=Homo sapiens GN=GSN PE=1 SV=1	HUMAN	0.925
38	14	14	34.2	10	sp|P02749|APOH_HUMAN	Beta-2-glycoprotein 1 OS=Homo sapiens GN=APOH PE=1 SV=3	HUMAN	1.4108
39	13.24	13.24	55.4	6	sp|P35542|SAA4_HUMAN	Serum amyloid A-4 protein OS=Homo sapiens GN=SAA4 PE=1 SV=1	HUMAN	0.9684
40	13.07	13.07	68.3	19	sp|P69905|HBA_HUMAN	Hemoglobin subunit alpha OS=Homo sapiens GN=HBA1 PE=1 SV=2	HUMAN	0.7293
41	12.01	12.63	19.5	9	sp|P19827|ITIH1_HUMAN	Inter-alpha-trypsin inhibitor heavy chain H1 OS=Homo sapiens GN=ITIH1 PE=1 SV=3	HUMAN	0.8402
42	12	12.01	21.2	6	sp|P05155|IC1_HUMAN	Plasma protease C1 inhibitor OS=Homo sapiens GN=SERPING1 PE=1 SV=2	HUMAN	0.8213
43	10.04	10.04	16.6	6	sp|P27169|PON1_HUMAN	Serum paraoxonase/arylesterase 1 OS=Homo sapiens GN=PON1 PE=1 SV=2	HUMAN	0.9529
44	10.02	10.02	17.9	6	sp|P02760|AMBP_HUMAN	Protein AMBP OS=Homo sapiens GN=AMBP PE=1 SV=1	HUMAN	1.1784
45	10.01	10.01	30.9	5	sp|P02753|RET4_HUMAN	Retinol-binding protein 4 OS=Homo sapiens GN=RBP4 PE=1 SV=3	HUMAN	1.2888
46	10.01	10.01	67.6	10	sp|P01842|LAC_HUMAN	Ig lambda chain C regions OS=Homo sapiens GN=IGLC1 PE=1 SV=1	HUMAN	0.8564
47	9.15	9.15	27	6	sp|P02652|APOA2_HUMAN	Apolipoprotein A-II OS=Homo sapiens GN=APOA2 PE=1 SV=1	HUMAN	0.9571
48	8.22	8.25	52.4	5	sp|P02766|TTHY_HUMAN	Transthyretin OS=Homo sapiens GN=TTR PE=1 SV=1	HUMAN	0.6806
49	8.15	8.15	20.8	4	sp|P63261|ACTG_HUMAN	Actin, cytoplasmic 2 OS=Homo sapiens GN=ACTG1 PE=1 SV=1	HUMAN	1.1166
50	8.01	8.01	18.7	4	sp|P35858|ALS_HUMAN	Insulin-like growth factor-binding protein complex acid labile chain OS=Homo sapiens GN=IGFALS PE=1 SV=1	HUMAN	0.9013
51	8	8	35.3	4	sp|P00915|CAH1_HUMAN	Carbonic anhydrase 1 OS=Homo sapiens GN=CA1 PE=1 SV=2	HUMAN	0.6396
52	7.15	7.15	13	3	sp|P02750|A2GL_HUMAN	Leucine-rich alpha-2-glycoprotein OS=Homo sapiens GN=LRG1 PE=1 SV=2	HUMAN	0.8066
53	6.02	6.02	17.8	3	sp|P29622|KAIN_HUMAN	Kallistatin OS=Homo sapiens GN=SERPINA4 PE=1 SV=3	HUMAN	0.991
54	6	6.03	9.7	3	sp|P43652|AFAM_HUMAN	Afamin OS=Homo sapiens GN=AFM PE=1 SV=1	HUMAN	0.8641
55	6	6	4.8	3	sp|P01031|CO5_HUMAN	Complement C5 OS=Homo sapiens GN=C5 PE=1 SV=4	HUMAN	0.8223
56	6	6	10.6	3	sp|P07357|CO8A_HUMAN	Complement component C8 alpha chain OS=Homo sapiens GN=C8A PE=1 SV=2	HUMAN	1.1432
57	6	6	36.4	9	sp|P02656|APOC3_HUMAN	Apolipoprotein C-III OS=Homo sapiens GN=APOC3 PE=1 SV=1	HUMAN	0.8272
58	6	6	38.6	3	sp|P02655|APOC2_HUMAN	Apolipoprotein C-II OS=Homo sapiens GN=APOC2 PE=1 SV=1	HUMAN	0.7792
59	5.7	5.7	11.8	4	sp|P08697|A2AP_HUMAN	Alpha-2-antiplasmin OS=Homo sapiens GN=SERPINF2 PE=1 SV=3	HUMAN	0.9675
60	5.4	5.42	12.2	3	sp|P02748|CO9_HUMAN	Complement component C9 OS=Homo sapiens GN=C9 PE=1 SV=2	HUMAN	0.9293
61	4.85	4.85	11.6	2	sp|P05546|HEP2_HUMAN	Heparin cofactor 2 OS=Homo sapiens GN=SERPIND1 PE=1 SV=3	HUMAN	1.1606
62	4.85	4.85	36	6	sp|P01621|KV303_HUMAN	Ig kappa chain V-III region NG9 (Fragment) OS=Homo sapiens PE=1 SV=1	HUMAN
63	4.7	38.07	63.2	29	sp|P01877|IGHA2_HUMAN	Ig alpha-2 chain C region OS=Homo sapiens GN=IGHA2 PE=1 SV=3	HUMAN	1.0439
64	4.02	4.02	25	9	sp|P01766|HV305_HUMAN	Ig heavy chain V-III region BRO OS=Homo sapiens PE=1 SV=1	HUMAN
65	4	4	12.7	2	sp|Q96PD5|PGRP2_HUMAN	N-acetylmuramoyl-L-alanine amidase OS=Homo sapiens GN=PGLYRP2 PE=1 SV=1	HUMAN	1.315
66	4	4	22.6	2	sp|P01591|IGJ_HUMAN	Immunoglobulin J chain OS=Homo sapiens GN=IGJ PE=1 SV=3	HUMAN	0.7116
67	4	4	10.3	2	sp|P01019|ANGT_HUMAN	Angiotensinogen OS=Homo sapiens GN=AGT PE=1 SV=1	HUMAN	1.1625
68	4	4	8.6	2	sp|P51884|LUM_HUMAN	Lumican OS=Homo sapiens GN=LUM PE=1 SV=2	HUMAN	0.9052
69	4	4	25.6	4	sp|P01764|HV303_HUMAN	Ig heavy chain V-III region VH26 OS=Homo sapiens PE=1 SV=1	HUMAN
70	4	4	17.8	5	sp|P01717|LV403_HUMAN	Ig lambda chain V-IV region Hil OS=Homo sapiens PE=1 SV=1	HUMAN	0.8451
71	3.7	3.7	23.4	3	sp|P80748|LV302_HUMAN	Ig lambda chain V-III region LOI OS=Homo sapiens PE=1 SV=1	HUMAN	0.7963
72	3.7	3.7	3.9	2	sp|P04003|C4BPA_HUMAN	C4b-binding protein alpha chain OS=Homo sapiens GN=C4BPA PE=1 SV=2	HUMAN	1.0031
73	3.48	14.82	41.3	8	sp|P19652|A1AG2_HUMAN	Alpha-1-acid glycoprotein 2 OS=Homo sapiens GN=ORM2 PE=1 SV=2	HUMAN
74	2.29	2.29	8.4	1	sp|O43866|CD5L_HUMAN	CD5 antigen-like OS=Homo sapiens GN=CD5L PE=1 SV=1	HUMAN	1.0723
75	2.24	25.7	22.1	15	sp|P20742|PZP_HUMAN	Pregnancy zone protein OS=Homo sapiens GN=PZP PE=1 SV=3	HUMAN	1.0441
76	2.24	2.27	12.8	1	sp|P10643|CO7_HUMAN	Complement component C7 OS=Homo sapiens GN=C7 PE=1 SV=2	HUMAN	0.9835
77	2.19	2.19	23.9	1	sp|P04208|LV106_HUMAN	Ig lambda chain V-I region WAH OS=Homo sapiens PE=1 SV=1	HUMAN	0.9384
78	2.12	2.13	2.7	1	sp|P05156|CFAI_HUMAN	Complement factor I OS=Homo sapiens GN=CFI PE=1 SV=1	HUMAN	0.9299
79	2.01	2.01	10	1	sp|P04180|LCAT_HUMAN	Phosphatidylcholine-sterol acyltransferase OS=Homo sapiens GN=LCAT PE=1 SV=1	HUMAN	0.7517
80	2	14.08	73.5	15	sp|P02042|HBD_HUMAN	Hemoglobin subunit delta OS=Homo sapiens GN=HBD PE=1 SV=2	HUMAN
81	2	12.19	28	6	cont|000097	gi|1351907|sp|P02769|ALBU_BOVIN Serum albumin precursor (Allergen Bos d 6) (BSA) [Bos taurus (contaminant)]	Bos taurus (contaminant)
82	2	8.01	20.4	10	sp|P69892|HBG2_HUMAN	Hemoglobin subunit gamma-2 OS=Homo sapiens GN=HBG2 PE=1 SV=2	HUMAN	0.7038
83	2	2	20.4	1	sp|O14791|APOL1_HUMAN	Apolipoprotein L1 OS=Homo sapiens GN=APOL1 PE=1 SV=5	HUMAN	0.5626
84	2	2	5.8	1	sp|P07225|PROS_HUMAN	Vitamin K-dependent protein S OS=Homo sapiens GN=PROS1 PE=1 SV=1	HUMAN	0.9161
85	2	2	19.7	1	sp|P32119|PRDX2_HUMAN	Peroxiredoxin-2 OS=Homo sapiens GN=PRDX2 PE=1 SV=5	HUMAN	0.8439
86	2	2	29.6	1	sp|P04433|KV309_HUMAN	Ig kappa chain V-III region VG (Fragment) OS=Homo sapiens PE=4 SV=1	HUMAN	0.8908
87	2	2	10.5	1	sp|P04278|SHBG_HUMAN	Sex hormone-binding globulin OS=Homo sapiens GN=SHBG PE=1 SV=2	HUMAN	1.216
88	2	2	3.7	1	sp|Q04756|HGFA_HUMAN	Hepatocyte growth factor activator OS=Homo sapiens GN=HGFAC PE=1 SV=1	HUMAN	0.9094
89	2	2	5.2	1	sp|P43251|BTD_HUMAN	Biotinidase OS=Homo sapiens GN=BTD PE=1 SV=1	HUMAN	0.9216
90	2	2	17.7	1	sp|P22352|GPX3_HUMAN	Glutathione peroxidase 3 OS=Homo sapiens GN=GPX3 PE=1 SV=2	HUMAN	0.7074
91	2	2	17.3	1	sp|P06313|KV403_HUMAN	Ig kappa chain V-IV region JI OS=Homo sapiens PE=2 SV=1	HUMAN	0.8715
92	2	2	12.4	1	sp|P05452|TETN_HUMAN	Tetranectin OS=Homo sapiens GN=CLEC3B PE=1 SV=2	HUMAN	0.8858
93	2	2	3.6	1	sp|P03952|KLKB1_HUMAN	Plasma kallikrein OS=Homo sapiens GN=KLKB1 PE=1 SV=1	HUMAN	0.6973
94	2	2	5.8	1	RRRRRsp|Q7Z572|SPT21_HUMAN	REVERSED Spermatogenesis-associated protein 21 OS=Homo sapiens GN=SPATA21 PE=2 SV=3	HUMAN	0.4267
95	2	2	2.2	1	sp|Q08380|LG3BP_HUMAN	Galectin-3-binding protein OS=Homo sapiens GN=LGALS3BP PE=1 SV=1	HUMAN	0.8601
96	2	2	6.3	1	sp|P15169|CBPN_HUMAN	Carboxypeptidase N catalytic chain OS=Homo sapiens GN=CPN1 PE=1 SV=1	HUMAN	0.7528
97	2	2	2	1	sp|P08185|CBG_HUMAN	Corticosteroid-binding globulin OS=Homo sapiens GN=SERPINA6 PE=1 SV=1	HUMAN	0.9419
98	2	2	11.7	1	sp|P02775|CXCL7_HUMAN	Platelet basic protein OS=Homo sapiens GN=PPBP PE=1 SV=3	HUMAN	0.7042
99	1.81	1.81	6.9	1	sp|O95445|APOM_HUMAN	Apolipoprotein M OS=Homo sapiens GN=APOM PE=1 SV=2	HUMAN	0.774
100	1.7	2.19	2.2	1	RRRRRsp|Q8NI27|THOC2_HUMAN	REVERSED THO complex subunit 2 OS=Homo sapiens GN=THOC2 PE=1 SV=1	HUMAN
101	1.7	1.7	7.4	1	RRRRRsp|Q16478|GRIK5_HUMAN	REVERSED Glutamate receptor, ionotropic kainate 5 OS=Homo sapiens GN=GRIK5 PE=2 SV=2	HUMAN	0.8892

## Sheet: N4
								115 label: T1 serum
								117 label: T2 serum
Healthy volunteer N4
N	Unused	Total	% Cov	Peptides(95%)	Accession #	Name	Species	117:115
1	101.74	101.74	56.6	92	sp|P02787|TRFE_HUMAN	Serotransferrin OS=Homo sapiens GN=TF PE=1 SV=2	HUMAN	1.0652
2	93.98	93.98	71.6	92	sp|P02768|ALBU_HUMAN	Serum albumin OS=Homo sapiens GN=ALB PE=1 SV=2	HUMAN	0.5125
3	86.95	86.95	36.5	61	sp|P01024|CO3_HUMAN	Complement C3 OS=Homo sapiens GN=C3 PE=1 SV=2	HUMAN	1.4901
4	82	82	34.2	73	sp|P01023|A2MG_HUMAN	Alpha-2-macroglobulin OS=Homo sapiens GN=A2M PE=1 SV=1	HUMAN	1.2923
5	55.58	55.58	71.9	56	sp|P00738|HPT_HUMAN	Haptoglobin OS=Homo sapiens GN=HP PE=1 SV=1	HUMAN	1.8567
6	45.14	45.14	52.7	38	sp|P01876|IGHA1_HUMAN	Ig alpha-1 chain C region OS=Homo sapiens GN=IGHA1 PE=1 SV=2	HUMAN	0.9483
7	36.9	36.9	36.7	28	sp|P01871|IGHM_HUMAN	Ig mu chain C region OS=Homo sapiens GN=IGHM PE=1 SV=3	HUMAN	1.3768
8	33.1	33.1	17.5	19	sp|P0C0L5|CO4B_HUMAN	Complement C4-B OS=Homo sapiens GN=C4B PE=1 SV=1	HUMAN	1.4827
9	32.3	32.3	43.1	32	sp|P01009|A1AT_HUMAN	Alpha-1-antitrypsin OS=Homo sapiens GN=SERPINA1 PE=1 SV=3	HUMAN	1.2415
10	32.17	32.19	28.8	21	sp|P00450|CERU_HUMAN	Ceruloplasmin OS=Homo sapiens GN=CP PE=1 SV=1	HUMAN	1.5492
11	29.65	29.65	73.5	44	sp|P68871|HBB_HUMAN	Hemoglobin subunit beta OS=Homo sapiens GN=HBB PE=1 SV=2	HUMAN	0.1263
12	29	29	42	18	sp|P02790|HEMO_HUMAN	Hemopexin OS=Homo sapiens GN=HPX PE=1 SV=2	HUMAN	1.0485
13	26.46	26.46	54.3	19	cont|000137	spt|P00760| Cationic trypsin precursor (EC 3.4.21.4) (Beta-trypsin) (Fragment) [Bos taurus (contaminant)]	Bos taurus (contaminant)	1.1987
14	22.88	22.91	7.5	13	sp|P04114|APOB_HUMAN	Apolipoprotein B-100 OS=Homo sapiens GN=APOB PE=1 SV=1	HUMAN	1.5137
15	21.1	21.1	26.6	13	sp|P04004|VTNC_HUMAN	Vitronectin OS=Homo sapiens GN=VTN PE=1 SV=1	HUMAN	1.1459
16	20.33	20.34	47.6	15	sp|P02647|APOA1_HUMAN	Apolipoprotein A-I OS=Homo sapiens GN=APOA1 PE=1 SV=1	HUMAN	0.6645
17	18.75	18.75	64.8	45	sp|P69905|HBA_HUMAN	Hemoglobin subunit alpha OS=Homo sapiens GN=HBA1 PE=1 SV=2	HUMAN	0.1956
18	18.08	18.09	14.3	10	sp|P08603|CFAH_HUMAN	Complement factor H OS=Homo sapiens GN=CFH PE=1 SV=4	HUMAN	1.2994
19	17	17.06	16.1	10	sp|P19823|ITIH2_HUMAN	Inter-alpha-trypsin inhibitor heavy chain H2 OS=Homo sapiens GN=ITIH2 PE=1 SV=1	HUMAN	1.4192
20	16.07	16.07	24	13	sp|P02765|FETUA_HUMAN	Alpha-2-HS-glycoprotein OS=Homo sapiens GN=AHSG PE=1 SV=1	HUMAN	1.1879
21	16.03	16.03	22.6	8	sp|P04217|A1BG_HUMAN	Alpha-1B-glycoprotein OS=Homo sapiens GN=A1BG PE=1 SV=3	HUMAN	1.198
22	14	14	61	11	sp|P01842|LAC_HUMAN	Ig lambda chain C regions OS=Homo sapiens GN=IGLC1 PE=1 SV=1	HUMAN	1.3004
23	13.71	13.93	23.9	7	sp|P01008|ANT3_HUMAN	Antithrombin-III OS=Homo sapiens GN=SERPINC1 PE=1 SV=1	HUMAN	1.1647
24	13.4	13.4	13.4	8	sp|Q14624|ITIH4_HUMAN	Inter-alpha-trypsin inhibitor heavy chain H4 OS=Homo sapiens GN=ITIH4 PE=1 SV=3	HUMAN	1.3517
25	13.23	13.23	39.3	7	sp|P02763|A1AG1_HUMAN	Alpha-1-acid glycoprotein 1 OS=Homo sapiens GN=ORM1 PE=1 SV=1	HUMAN	1.7613
26	12.53	12.55	22.2	7	sp|P01011|AACT_HUMAN	Alpha-1-antichymotrypsin OS=Homo sapiens GN=SERPINA3 PE=1 SV=2	HUMAN	1.5113
27	11.7	11.7	33.6	8	sp|P25311|ZA2G_HUMAN	Zinc-alpha-2-glycoprotein OS=Homo sapiens GN=AZGP1 PE=1 SV=1	HUMAN	1.2209
28	10.97	10.97	23	8	sp|P00734|THRB_HUMAN	Prothrombin OS=Homo sapiens GN=F2 PE=1 SV=2	HUMAN	0.9787
29	10.26	10.26	58.5	13	sp|P01834|IGKC_HUMAN	Ig kappa chain C region OS=Homo sapiens GN=IGKC PE=1 SV=1	HUMAN	1.1576
30	8.78	8.78	30	4	sp|P02649|APOE_HUMAN	Apolipoprotein E OS=Homo sapiens GN=APOE PE=1 SV=1	HUMAN	0.8188
31	8.51	8.51	14.4	6	sp|P02774|VTDB_HUMAN	Vitamin D-binding protein OS=Homo sapiens GN=GC PE=1 SV=1	HUMAN	1.1564
32	8.14	8.14	8.7	4	sp|P01042|KNG1_HUMAN	Kininogen-1 OS=Homo sapiens GN=KNG1 PE=1 SV=2	HUMAN	1.6084
33	8.04	8.11	13.3	4	sp|P19827|ITIH1_HUMAN	Inter-alpha-trypsin inhibitor heavy chain H1 OS=Homo sapiens GN=ITIH1 PE=1 SV=3	HUMAN	1.3349
34	8	8	7.7	6	sp|P02671|FIBA_HUMAN	Fibrinogen alpha chain OS=Homo sapiens GN=FGA PE=1 SV=2	HUMAN	4.3016
35	7.15	7.15	12.3	3	sp|P10909|CLUS_HUMAN	Clusterin OS=Homo sapiens GN=CLU PE=1 SV=1	HUMAN	1.0165
36	6.55	6.55	21.2	5	sp|P05090|APOD_HUMAN	Apolipoprotein D OS=Homo sapiens GN=APOD PE=1 SV=1	HUMAN	1.1322
37	6.05	6.05	9.9	4	sp|P00747|PLMN_HUMAN	Plasminogen OS=Homo sapiens GN=PLG PE=1 SV=2	HUMAN	1.0707
38	6.02	6.02	16.6	4	sp|P04196|HRG_HUMAN	Histidine-rich glycoprotein OS=Homo sapiens GN=HRG PE=1 SV=1	HUMAN	1.0608
39	6	6	9.6	3	sp|P06396|GELS_HUMAN	Gelsolin OS=Homo sapiens GN=GSN PE=1 SV=1	HUMAN	1.2269
40	6	6	14.4	4	sp|P27169|PON1_HUMAN	Serum paraoxonase/arylesterase 1 OS=Homo sapiens GN=PON1 PE=1 SV=2	HUMAN	1.247
41	6	6	14.7	3	sp|P01859|IGHG2_HUMAN	Ig gamma-2 chain C region OS=Homo sapiens GN=IGHG2 PE=1 SV=2	HUMAN	0.421
42	6	6	16.1	4	sp|P02743|SAMP_HUMAN	Serum amyloid P-component OS=Homo sapiens GN=APCS PE=1 SV=2	HUMAN	4.235
43	6	6	36.4	5	sp|P02656|APOC3_HUMAN	Apolipoprotein C-III OS=Homo sapiens GN=APOC3 PE=1 SV=1	HUMAN	1.4907
44	5.29	5.29	11	2	sp|P00751|CFAB_HUMAN	Complement factor B OS=Homo sapiens GN=CFB PE=1 SV=2	HUMAN	1.328
45	4.47	4.47	47.7	2	sp|P35542|SAA4_HUMAN	Serum amyloid A-4 protein OS=Homo sapiens GN=SAA4 PE=1 SV=1	HUMAN	1.6035
46	4.46	4.46	11.6	2	sp|P06727|APOA4_HUMAN	Apolipoprotein A-IV OS=Homo sapiens GN=APOA4 PE=1 SV=3	HUMAN	0.9212
47	4.33	4.33	27	3	sp|P02749|APOH_HUMAN	Beta-2-glycoprotein 1 OS=Homo sapiens GN=APOH PE=1 SV=3	HUMAN	0.6928
48	4.11	4.11	6.9	2	sp|P04003|C4BPA_HUMAN	C4b-binding protein alpha chain OS=Homo sapiens GN=C4BPA PE=1 SV=2	HUMAN	0.9411
49	4.02	4.02	35	5	sp|P01621|KV303_HUMAN	Ig kappa chain V-III region NG9 (Fragment) OS=Homo sapiens PE=1 SV=1	HUMAN	1.0116
50	4	4	9.6	3	sp|P08697|A2AP_HUMAN	Alpha-2-antiplasmin OS=Homo sapiens GN=SERPINF2 PE=1 SV=3	HUMAN	1.3717
51	4	4	22.6	3	sp|P00915|CAH1_HUMAN	Carbonic anhydrase 1 OS=Homo sapiens GN=CA1 PE=1 SV=2	HUMAN	0.1048
52	4	4	20.5	2	sp|P23083|HV103_HUMAN	Ig heavy chain V-I region V35 OS=Homo sapiens PE=1 SV=1	HUMAN	0.9018
53	4	4	17.8	6	sp|P01717|LV403_HUMAN	Ig lambda chain V-IV region Hil OS=Homo sapiens PE=1 SV=1	HUMAN	1.4454
54	3.3	4	20.9	2	sp|P04207|KV308_HUMAN	Ig kappa chain V-III region CLL OS=Homo sapiens PE=1 SV=2	HUMAN
55	3.3	3.3	9.1	3	sp|P02748|CO9_HUMAN	Complement component C9 OS=Homo sapiens GN=C9 PE=1 SV=2	HUMAN	1.4802
56	2.62	6	10.3	3	sp|P01857|IGHG1_HUMAN	Ig gamma-1 chain C region OS=Homo sapiens GN=IGHG1 PE=1 SV=1	HUMAN
57	2	13.82	33.9	15	cont|000097	gi|1351907|sp|P02769|ALBU_BOVIN Serum albumin precursor (Allergen Bos d 6) (BSA) [Bos taurus (contaminant)]	Bos taurus (contaminant)
58	2	2.89	8.2	1	sp|P68133|ACTS_HUMAN	Actin, alpha skeletal muscle OS=Homo sapiens GN=ACTA1 PE=1 SV=1	HUMAN	1.2092
59	2	2.25	7.5	1	sp|P43652|AFAM_HUMAN	Afamin OS=Homo sapiens GN=AFM PE=1 SV=1	HUMAN	1.2665
60	2	2.01	6.4	1	sp|P05155|IC1_HUMAN	Plasma protease C1 inhibitor OS=Homo sapiens GN=SERPING1 PE=1 SV=2	HUMAN	1.2177
61	2	2	8.5	1	sp|Q08380|LG3BP_HUMAN	Galectin-3-binding protein OS=Homo sapiens GN=LGALS3BP PE=1 SV=1	HUMAN	1.0966
62	2	2	5.5	1	sp|P35858|ALS_HUMAN	Insulin-like growth factor-binding protein complex acid labile chain OS=Homo sapiens GN=IGFALS PE=1 SV=1	HUMAN	1.1184
63	2	2	18.7	2	sp|P06314|KV404_HUMAN	Ig kappa chain V-IV region B17 OS=Homo sapiens PE=2 SV=1	HUMAN	1.4423
64	2	2	23.5	1	sp|P04433|KV309_HUMAN	Ig kappa chain V-III region VG (Fragment) OS=Homo sapiens PE=4 SV=1	HUMAN	1.2999
65	2	2	5.7	1	sp|P02760|AMBP_HUMAN	Protein AMBP OS=Homo sapiens GN=AMBP PE=1 SV=1	HUMAN	0.8621
66	2	2	9.1	1	sp|P32119|PRDX2_HUMAN	Peroxiredoxin-2 OS=Homo sapiens GN=PRDX2 PE=1 SV=5	HUMAN	0.4751
67	2	2	10.4	1	sp|P05452|TETN_HUMAN	Tetranectin OS=Homo sapiens GN=CLEC3B PE=1 SV=2	HUMAN	1.3552
68	2	2	16.4	1	sp|P01779|HV318_HUMAN	Ig heavy chain V-III region TUR OS=Homo sapiens PE=1 SV=1	HUMAN
69	2	2	16	3	sp|P01777|HV316_HUMAN	Ig heavy chain V-III region TEI OS=Homo sapiens PE=1 SV=1	HUMAN
70	2	2	11	2	sp|P01591|IGJ_HUMAN	Immunoglobulin J chain OS=Homo sapiens GN=IGJ PE=1 SV=3	HUMAN	1.1823
71	1.7	1.7	6.1	1	sp|O43866|CD5L_HUMAN	CD5 antigen-like OS=Homo sapiens GN=CD5L PE=1 SV=1	HUMAN	0.9537
72	1.52	1.52	6.1	1	RRRRRsp|Q16478|GRIK5_HUMAN	REVERSED Glutamate receptor, ionotropic kainate 5 OS=Homo sapiens GN=GRIK5 PE=2 SV=2	HUMAN	0.8401
73	1.22	5.25	23.4	2	sp|P19652|A1AG2_HUMAN	Alpha-1-acid glycoprotein 2 OS=Homo sapiens GN=ORM2 PE=1 SV=2	HUMAN
74	1.22	1.22	6.9	0	sp|O95445|APOM_HUMAN	Apolipoprotein M OS=Homo sapiens GN=APOM PE=1 SV=2	HUMAN	1.0609
75	0.93	0.93	4.8	0	sp|P28356|HXD9_HUMAN	Homeobox protein Hox-D9 OS=Homo sapiens GN=HOXD9 PE=2 SV=3	HUMAN
76	0.92	0.92	3.8	0	sp|P05546|HEP2_HUMAN	Heparin cofactor 2 OS=Homo sapiens GN=SERPIND1 PE=1 SV=3	HUMAN	1.1939
77	0.8	0.81	2.9	0	RRRRRsp|Q12830|BPTF_HUMAN	REVERSED Nucleosome-remodeling factor subunit BPTF OS=Homo sapiens GN=BPTF PE=1 SV=3	HUMAN
